19 **Abstract:**

20 The spindle assembly checkpoint (SAC) safeguards the genome during cell division by  
21 generating an effector molecule known as the Mitotic Checkpoint Complex (MCC). The MCC  
22 comprises two subcomplexes, and during its assembly, formation of the CDC20:MAD2  
23 subcomplex is the rate-limiting step. Recent studies show that the rate of CDC20:MAD2  
24 formation is significantly accelerated by the cooperative binding of CDC20 to SAC proteins  
25 MAD1 and BUB1. However, the molecular basis for this acceleration is not fully understood.  
26 Here, we demonstrate that the structural flexibility of MAD1 at a conserved hinge near the C-  
27 terminus is essential for catalytic MCC assembly. This MAD1 hinge enables the MAD1:MAD2  
28 complex to assume a folded conformation *in vivo*. Importantly, truncating the hinge reduces the  
29 rate of MCC assembly *in vitro* and SAC signaling *in vivo*. Conversely, mutations that preserve  
30 hinge flexibility retain SAC signaling, indicating that the structural flexibility of the hinge, rather  
31 than a specific amino acid sequence, is important for SAC signaling. We summarize these  
32 observations in a “knitting” model that explains how the folded conformation of MAD1:MAD2  
33 promotes CDC20:MAD2 assembly.

34 During mitosis, a parent cell divides into two genetically identical daughter cells. To achieve  
35 this, the duplicated chromosomes in the parent cell must be equally distributed into the two  
36 daughter cells. The spindle assembly checkpoint (SAC) serves as a surveillance mechanism to  
37 ensure that duplicated chromosomes are stably attached to spindle microtubules through an  
38 adaptor structure named the kinetochore. Kinetochores lacking end-on microtubule attachment  
39 activate the SAC to prevent premature anaphase onset and avoid chromosome missegregation.  
40 The effector molecule generated upon SAC activation is the Mitotic Checkpoint Complex  
41 (MCC). The MCC consists of two subcomplexes: BUBR1:BUB3 and CDC20:MAD2<sup>1,2</sup>. It  
42 inhibits the E3 ubiquitin ligase anaphase-promoting complex/cyclosome (APC/C)<sup>3-5</sup>. APC/C  
43 ubiquitinates Cyclin B1, a key mitosis regulator, thereby targeting it for proteasome-mediated  
44 degradation<sup>6-8</sup>. Inhibition of the APC/C suppresses the degradation of Cyclin B1, which in turn  
45 delays anaphase onset.

46 The formation of the CDC20:MAD2 dimer has been identified as the rate-limiting step in the  
47 assembly of the MCC<sup>9,10</sup>. This biochemical step is catalyzed by other checkpoint proteins,  
48 including the MAD1:MAD2 complex and the BUB1:BUB3 complex, that recruit the MCC  
49 subunits and facilitate their interaction. A crucial aspect of the reaction that allows MAD2 to  
50 bind CDC20 is the conversion of MAD2 from an open conformation (O-MAD2) to a closed  
51 conformation (C-MAD2)<sup>11-14</sup>. During this conversion, the C-terminal “safety belt” of MAD2  
52 embraces the flexible MAD2-interacting motif (MIM) of CDC20<sup>2,13</sup>. Purified monomeric O-  
53 MAD2 spontaneously converts into C-MAD2 at 30 °C *in vitro* with kinetics that are orders of  
54 magnitude slower than expected to support robust CDC20:MAD2 formation during mitosis<sup>15</sup>. In  
55 a reconstituted reaction *in vitro*, MAD1:MAD2 and BUB1:BUB3 were shown to dramatically  
56 accelerate the assembly of the CDC20:MAD2 complex, suggesting that they are the catalysts in  
57 the assembly reaction<sup>10,16</sup>. The “MAD2 template model”<sup>14</sup> argues that the conformational  
58 switch is facilitated by the dimerization between one C-MAD2 (bound to MAD1’s MIM in the  
59 MAD1:MAD2 complex) and a cytosolic O-MAD2 that undergoes the conformational switch to  
60 bind CDC20. Furthermore, two recent studies show that the docking of CDC20 on multiple  
61 interfaces on MAD1 and BUB1 enables spatio-temporal coupling of the MAD2 conformational  
62 switch with its binding to CDC20 thereby overcoming the rate-limiting step and accelerating

63 MCC assembly<sup>16,17</sup>. The exact molecular mechanism of this coupling, however, remains to be  
64 elucidated.

65 In this paper, supported by modeling of the MAD1:MAD2 complex, we hypothesize that  
66 efficient CDC20:MAD2 formation may require a folded conformation of the "MAD1 C-terminal  
67 region". We define the MAD1 C-terminal region as spanning residues 485-718 including the  
68 Mad1 C-terminal domain (Mad1-CTD) known to be essential for catalysis<sup>10,13,17-21</sup>. In  
69 agreement with this hypothesis, fluorescence-lifetime imaging (FLIM) suggests that the C-  
70 terminal hinge of MAD1 enables the MAD1:MAD2 complex to take a folded conformation *in*  
71 *vivo*. Importantly, disrupting the structural flexibility of MAD1 by removing the hinge impairs  
72 the rate of MCC assembly *in vitro* and the SAC signaling activity *in vivo*. Mutating this region  
73 while keeping its flexibility maintains the SAC signaling activity, indicating that the structural  
74 flexibility (rather than the primary sequence specificity) of MAD1 is important to the SAC. We  
75 propose a "knitting model" that describes how the MAD2 conformational switch is coupled to  
76 the formation of CDC20:MAD2, which is key for rapid activation of the SAC in living cells.

77

## 78 The MAD1:MAD2 complex may assume a folded 79 conformation *in vivo*

80 The MAD1:MAD2 complex is a 2 : 2 heterotetramer. Prior studies have defined the structures of  
81 two non-overlapping, dimeric segments of the of the C-terminal region of this heterotetramer:  
82 one spanning residues 485-584 and complexed with two MAD2 molecules, and the other, termed  
83 as the Mad1-CTD, spanning residues 597-718<sup>13,18</sup>. The SAC kinase MPS1 phosphorylates T716  
84 within the RING finger-containing proteins, WD repeat-containing proteins, and DEAD-like  
85 helicases (RWD) domain at the C-terminus of MAD1. Upon phosphorylation, MAD1-CTD  
86 binds the BOX1 motif in the N-terminal region of CDC20<sup>16,21</sup>, and this interaction is critical for  
87 MCC assembly<sup>10,21,22</sup>. It likely facilitates the coupling of the MAD2 conformational switch with  
88 CDC20 binding. However, if we model the disordered N-terminus of human CDC20 as a simple

89 3-D random walk, the estimated root-mean-square distance from BOX1 (27–34) to MIM (129–  
90 133) is less than 4 nm. The worm-like chain model with a persistence length of 0.3–0.7 nm  
91 estimates the root-mean-square distance to be 4.5–7.4 nm<sup>23, 24</sup>. On the other hand, the combined  
92 axial length from the MAD1 MIM to the RWD domain is over 12 nm, according to crystal  
93 structures of the two MAD1:MAD2 segments (Figure 1A, left panel)<sup>13, 18</sup>. Therefore, the  
94 flexibility of the CDC20 N-terminus may not be sufficient to position the MIM of CDC20  
95 proximally with respect to MAD2, and additional mechanisms may facilitate the efficient capture  
96 of the CDC20 MIM by MAD2.

97 To gather possible clues, we used AlphaFold 2<sup>25, 26</sup> to predict how the structurally known  
98 segments of MAD1 may be arranged. In addition to an extended conformation, this analysis  
99 predicted the existence of a folded conformation of MAD1 enabled by a flexible hinge spanning  
100 residues 582 and 600 (Figure 1A, right panel). We reasoned that the folded MAD1 conformation  
101 would permit the phosphorylated C-terminal RWD domains of MAD1 to approach the reaction  
102 center of the MAD1:MAD2 template complex where O-MAD2 is expected to undergo the  
103 conformational switch and bind CDC20 (Figure 1B). Interestingly, the primary sequence of the  
104 hinge region is not conserved from yeast to human (Figure S2B), but an interruption of the  
105 coiled-coil around this region appears to be universal (Figure S2C). According to AlphaFold 2  
106 predictions, the flexibility of the hinge region enables MAD1 to assume a spectrum of  
107 conformations, from fully extended to folded (Figure 1A)<sup>25, 26</sup>.

108 To test whether the MAD1:MAD2 complex assumes a folded conformation *in vivo*, we resorted  
109 to distance-sensitive Förster resonance energy transfer (FRET) assays. The folded conformation  
110 is expected to drastically reduce the distance between the RWD domain and the MIM of MAD1,  
111 and a correctly designed FRET sensor may be able to differentiate the folded conformation from  
112 the extended conformation (Figure 1A). Using CRISPR-Cas9-mediated genome editing, we  
113 fused the donor fluorophore mNeonGreen to the C-terminal end of MAD1 and inserted the  
114 acceptor fluorophore mScarlet-I<sup>27</sup> in the  $\beta 5$ - $\alpha C$  loop of MAD2 (the exogenous protein is  
115 henceforth referred to as “MAD2 $\Delta$ mScarlet-I”; Figures S1A and S1C)<sup>28</sup>. This strategy positions  
116 the acceptor fluorophore away from known functional interfaces of MAD2 (including the MAD2  
117 homodimerization interface, the safety belt, and the interface between MAD2 and BUBR1 in the  
118 MCC)<sup>2, 14, 28, 29</sup>. This strategy also takes into account our unpublished observations that in the

119 budding yeast *Saccharomyces cerevisiae*, neither N- nor C-terminally tagged Mad2 supports  
120 SAC signaling. In the extended conformation, the distance between the donor and acceptor will  
121 be larger than 10 nm, allowing minimal FRET between the donor and the acceptor<sup>30</sup>.  
122 Conversely, in the folded conformation, the distance between the donor and the acceptor will be  
123 reduced, increasing the efficiency of FRET between the donor and the acceptor (Figure 1C, left  
124 panel).

125 We first tested that in the budding yeast, exogenous internally-tagged Mad2 supports the SAC  
126 activity in the *mad2Δ* background (Figure S1B). Next, we confirmed the expression of full-  
127 length MAD2 $\Delta$ mScarlet-I in the heterozygous *MAD2* $\Delta$ mScarlet-I genome-edited HeLa-A12 cell  
128 line, wherein the expression level of either BUBR1 or CDC20 was not affected (Figure S1D).  
129 Internally tagged MAD2 partially restores the SAC signaling activity in HeLa-A12 cells when  
130 endogenous MAD2 is knocked down via RNA interference (Figure S1E).

131 Using FLIM<sup>31</sup>, we quantified a FRET efficiency of about 3% between MAD1-mNG and  
132 MAD2 $\Delta$ mScarlet-I at the interphase/prophase nuclear pore complex (NPC), where  
133 MAD1:MAD2 resides during interphase, in the heterozygous *MAD1*-mNG, *MAD2* $\Delta$ mScarlet-I  
134 genome-edited HeLa-A12 cell line (Figure 1C, right panel). We measured FRET at the  
135 interphase/prophase NPC to facilitate data collection by the line-scanning confocal microscope  
136 and to reduce the interference of potential intermolecular FRET between a donor from one  
137 MAD1:MAD2 complex and an acceptor from another nearby complex, which is expected at the  
138 corona of a signaling kinetochore. This FRET persists even when *CDC20* is knocked down by  
139 RNAi (Figure 1D), suggesting that it is intrinsic to the MAD1:MAD2 complex. It should be  
140 noted that two experimental details contribute to the low FRET efficiency observed. First, only  
141 half of MAD1 and MAD2 are fluorescently labeled. Second, the combined size of the fluorescent  
142 proteins and the flexible linkers used to fuse them to MAD1 and MAD2 adds a significant  
143 distance to the actual separation between the two proteins<sup>30</sup>.

144 To reinforce these observations, we designed a MAD1 mutant (henceforth referred to as  
145 MAD1 $\Delta$ L) wherein the hinge (582–600) was deleted. This deletion preserves the heptad repeat  
146 periodicity of the upstream and downstream coiled-coils predicted by MARCOIL and DeepCoil2  
147 (data not shown)<sup>32-34</sup>. For the resulting hinge-deleted MAD1 mutant, AlphaFold 2 predicted an

148 uninterrupted and fully extended coiled-coil (Figure 1E, bottom left panel). The FRET efficiency  
149 of the mutant was reduced by half (to 1.5%). Even though there is some residual FRET between  
150 MAD1 $\Delta$ L-mNG and MAD2 $\Delta$ mScarlet-I (Figures 1C and 1E), these results support that the  
151 structural flexibility of the C-terminus of MAD1 enabled by the hinge facilitates folding of the  
152 MAD1:MAD2 complex *in vivo*.

## 153 MAD1's hinge is important to the rate of MCC assembly 154 *in vitro*

155 To test the role of the structural flexibility of MAD1 in the assembly of the MCC, we purified  
156 recombinant MAD1:MAD2 and MAD1 $\Delta$ L:MAD2 and compared their functionality in the  
157 previously established MCC FRET-sensor-based assays<sup>10, 16</sup>. Importantly, the complexes  
158 appeared stable and properly folded (Figure S2A).

159 Deletion of MAD1's hinge causes a moderate but reproducible decrease in the rate of MCC  
160 assembly compared to the wild-type (Figure 2B), indicating that the hinge is important to  
161 maximize the rate of MCC assembly *in vitro*. The rate difference between MAD1:MAD2 and  
162 MAD1 $\Delta$ L:MAD2 relied on the presence of BUB1:BUB3 (Figure 2C). More specifically, the rate  
163 difference required a functionally intact BUB1:BUB3 complex to interact with MAD1:MAD2,  
164 because the BUB1 $\Delta$ CM1 mutant that prevents this interaction erased the difference (Figure  
165 S2D).

166 Manifestation of a rate difference between MAD1:MAD2 and MAD1 $\Delta$ L:MAD2 also relied on  
167 the interaction of CDC20 with MAD1, as it was abolished by mutation of the BOX1 motif of  
168 CDC20 (Figure 2D). Collectively, these observations suggest that flexibility enabled by the  
169 hinge region allows MAD1:MAD2 to interact more productively with BUB1 and CDC20 during  
170 the catalytic conversion that promotes MCC assembly. In a solid phase binding assay with  
171 immobilized MAD1:MAD2, we found that the binding of O-MAD2, BUB1, and CDC20 was not  
172 overtly affected by the hinge-deletion mutation (Figure 2F). We conclude that the role of the  
173 structural flexibility of MAD1 in the rate of MCC assembly *in vitro* is critical to the appropriate  
174 spatial association of BUB1, CDC20, and MAD1:MAD2<sup>10, 16, 17</sup>; see Discussion).



## 175 The C-terminal hinge of MAD1 is important to the SAC 176 signaling activity *in vivo*

177 Next, we sought to determine whether the C-terminal hinge of MAD1 is important for SAC  
178 signaling *in vivo*. We integrated the expression cassette of either MAD1-mNG or MAD1 $\Delta$ L-  
179 mNG into the genome of HeLa-A12 cells using Cre-*lox* recombination-mediated cassette  
180 exchange (RMCE)<sup>35-37</sup>. We then knocked down endogenous MAD1 in these cells using two  
181 siRNAs that target the 3'-UTR of *MAD1*<sup>38</sup> (henceforth collectively referred to as si*MAD1*'s) and  
182 induced the expression of MAD1(WT/ $\Delta$ L)-mNG (si*MAD1*-resistant due to the lack of the  
183 endogenous 3'-UTR) by doxycycline. Our genome-edited *MAD1*-mNG HeLa-A12 cell line  
184 served as the reference for the endogenous level of MAD1 in live-cell fluorescence imaging.  
185 When quantifying the phenotypes of the knock-in/knock-down treatments, we ensured that the  
186 kinetochore recruitment of the MAD1 mutants used was comparable to the recruitment of  
187 *MAD1*-mNG in the genome-edited HeLa-A12 cells (see Methods).

188 Cells with less than 10% of the physiological level of MAD1 generally retained a robust  
189 checkpoint response in 100 nM nocodazole that could not be weakened by increasing the dosage  
190 of si*MAD1*'s (Figure S3A and S3B). Nonetheless, SAC signaling activity was crippled, as the  
191 depletion caused MAD1-depleted cells to leave mitosis at least two hours earlier than the  
192 untreated control (Figure 3A). In this context, however, expression of MAD1 $\Delta$ L-mNG resulted  
193 in a dominant-negative effect that considerably shortened the mitotic arrest. For comparison,  
194 wild-type MAD1-mNG restored the SAC signaling activity to levels observed in the negative  
195 control (Figure 3A). We reasoned that the dominant-negative effects of MAD1 $\Delta$ L-mNG reflect  
196 its dimerization with the residual endogenous MAD1 and consequent restriction of its structural  
197 flexibility. Indeed, an AlphaFold 2 structural prediction of MAD1:MAD1 $\Delta$ L suggested that the  
198 hinge region of wild-type MAD1 cannot adopt the folded conformation when facing the stiff  
199 continuous  $\alpha$ -helix of the MAD1 $\Delta$ L counterpart (Figure 3B). To test this experimentally, we  
200 pulled down doxycycline-induced MAD1(wild-type/ $\Delta$ L)-mNG from lysates of HeLa-A12 cells  
201 in which endogenous MAD1 was not knocked down. We found that endogenous MAD1 was  
202 pulled down both by MAD1-mNG and by MAD1 $\Delta$ L-mNG, but not by mNeonGreen alone



203 (Figure S3D). We further confirmed that MAD1 $\Delta$ L-mNG did not cause defects in the  
204 localization of the MAD1 $\Delta$ L:MAD2 complex (Figure S3C) or the expression of BUBR1,  
205 CDC20, or BUB3 (Figure S3B). Therefore, although the results of our knockdown-rescue  
206 experiments were hindered by the incomplete knockdown of the endogenous MAD1, all  
207 evidence combined suggested that the hinge of MAD1 is critical for the SAC.

## 208 MAD1(Lmut) can fully support the SAC signaling 209 activity

210 The observation that the hinge encompassing residues 582–600 of MAD1 is important for SAC  
211 signaling *in vivo* may have alternative explanations. For instance, it is known that S598 can be  
212 phosphorylated by MPS1 *in vitro*<sup>21</sup>, and we cannot exclude that the hinge of MAD1 is required  
213 for regulated, but unknown, protein-protein interactions important to the SAC. To distinguish  
214 among these possibilities, we reasoned that replacing the hinge with an equally flexible region of  
215 a diverged sequence should prevent sequence-specific physical interactions with putative binding  
216 partners while preserving MAD1's ability to adopt the folded conformation. Therefore, we tested  
217 two different artificial flexible hinges, “AL11” and “Lmut”, as a replacement for the original  
218 hinge segment (Figure 2A). Both replacements consist of 19 amino acid residues as the original  
219 hinge. AL11 is a previously characterized flexible linker composed of eleven alanine residues,  
220 seven glycine residues, and one threonine residue<sup>39</sup>. In Lmut, serine and threonine residues of  
221 the original segment are mutated into alanine and valine residues, respectively. The amino acids  
222 between the two prolines consist mostly of alanine-glycine-alanine repeats while the proline  
223 residues themselves and their N-terminal neighboring residues are preserved. Both  
224 MAD1(AL11) and MAD1(Lmut) are predicted to have a coiled-coil propensity profile similar to  
225 that of the endogenous MAD1 (Figure S4).

226 We observed that MAD1(AL11):MAD2 had the same MCC assembly activity as the wild-type  
227 complex in our *in vitro* assay (Figure 2E). We were unable to purify recombinant  
228 MAD1(Lmut):MAD2, possibly because of instability during protein purification introduced by  
229 the mutation. Both mutants were correctly expressed in HeLa cells (Figure S4B). Furthermore, in  
230 cells treated with siMAD1 and expressing MAD1(AL11)-mNG, SAC signaling appeared slightly

231 weaker than in cells expressing wild-type MAD1, while MAD1(Lmut)-mNG fully restored the  
232 SAC signaling activity (Figure 3C). We conclude that both MAD1 constructs with an artificial  
233 hinge are largely or completely checkpoint proficient, contrary to MAD1 $\Delta$ L. These observations  
234 suggest that the primary function of the hinge is providing structural flexibility rather than  
235 mediating unspecified protein-protein interactions.

## 236 Discussion

237 Here, we identified a previously unrecognized molecular mechanism that helps overcome the  
238 kinetic barrier associated with the binding of MAD2 and CDC20. A folded conformation of  
239 MAD1 positions the MIM of CDC20 and MAD2 closely, facilitating the assembly of the  
240 CDC20:MAD2 heterodimer. In a complementary study<sup>40</sup>, Fischer and colleagues demonstrate  
241 that the CM1 of human BUB1 and the  $\alpha$ 1 helix of CDC20, which precedes BOX1, interact in a  
242 tripartite 1:1:2 complex with the RLK motif of MAD1. Thus, collectively, CDC20 establishes  
243 multiple interfaces with the catalysts BUB1 and MAD1:MAD2, and these interactions likely  
244 position the CDC20 MIM for its efficient capture by MAD2. Switching back to an extended  
245 conformation may break the avidity, thereby releasing assembled CDC20:MAD2 into the  
246 cytosol. We use the “knitting” analogy to describe this model (Figure 4), as the two MAD1  
247 functional regions connected by the hinge switch their relative positioning and work coordinately  
248 like two knitting needles to “entangle” CDC20 and MAD2.

249 In the parallel study by Fischer and colleagues<sup>40</sup>, the purified MAD1:MAD2 complex was  
250 shown to exhibit a folded conformation *in vitro*. Here, we showed that the MAD1:MAD2  
251 complex may assume such a folded conformation also *in vivo*. Our data indicate that the  
252 structural flexibility is enabled by a flexible hinge in the C-terminus of MAD1, whose secondary  
253 structure – rather than primary sequence – is conserved. This hinge is important for MCC  
254 assembly *in vitro* and SAC signaling *in vivo*, and we provide evidence that it can be replaced  
255 with similarly flexible but different sequences, implying that the hinge is unlikely to mediate  
256 hitherto unknown physical interactions with other proteins. Thus, collectively, the structural  
257 flexibility of MAD1 appears to be important to the SAC signaling activity.

258 Whether MAD1 switches between an extended conformation and the folded conformation at a  
259 physiologically meaningful rate *in vivo*, and whether this switching cycle correlates with the  
260 “knitting” of a CDC20:MAD2 heterodimer is currently unclear. The distribution of  
261 conformations of the two proline residues (P585 and P596) in the hinge may be under active,  
262 energy-consuming regulation in the cell, but assessing this will require further analyses. We note  
263 that no MAD1-interacting protein with peptidylprolyl cis-trans isomerase activity has been  
264 identified in the PrePPI database as of March 2022<sup>41,42</sup>. It remains unknown whether the  
265 proline residues simply serve to break the coiled-coil or play a more complex role in promoting  
266 the folding of MAD1.

267 Our *in vitro* reconstitution data suggest that the critical role of the flexibility of MAD1 is strictly  
268 coupled with BUB1. In the absence of BUB1 in the reactions, the assembly rates of  
269 CDC20:MAD2 were the same for both MAD1 and MAD1 $\Delta$ L. However, assembly of MCC,  
270 albeit at low rates, continues during interphase and prophase<sup>43</sup>. There has been no report on  
271 BUB1’s localization at the NPC where the MAD1:MAD2 complex is predominantly localized  
272 during the interphase and prophase. Therefore, either the flexibility of MAD1 alone scaffolds  
273 CDC20:MAD2 coupling at the NPC or there may be a nucleoporin that functions similarly to  
274 BUB1. Interestingly, the nuclear basket protein TPR, which is directly associated with the  
275 MAD1:MAD2 complex during the interphase and prophase<sup>44</sup>, is predicted to bind to CDC20  
276 directly in the PrePPI database<sup>42</sup>. Future studies should look into how the MAD1:MAD2  
277 complex may catalyze the formation of the CDC20:MAD2 dimer at the NPC during the  
278 interphase and prophase.

## 279 Author contributions

280 C.C., A.M., and A.P.J. wrote the manuscript. V.P. contributed to its revision. C.C. performed all  
281 human cell experiments. S.J.Y.H. and B.R. performed all experiments related to budding yeasts.  
282 V.P. purified recombinant proteins and performed all MCC FRET-sensor-based assays. A.A.  
283 performed the pull-down experiment with amylose beads. P.J.H.I.V. performed low-angle metal  
284 shadowing and electron microscopy.

## 285 Declaration of conflicting interest

286 The authors declare no conflict of interest.

## 287 Acknowledgments

288 This study is funded by NIH grant R35-GM-126983-01 (to A.P.J.). We thank the Single  
289 Molecule Analysis in Real-Time Center at the University of Michigan (seeded by NSF MRI-R2-  
290 ID award DBI-0959823 to Nils G. Walter) and J. Damon Hoff for technical advice on FLIM. We  
291 thank the Flow Cytometry Core at the University of Michigan Medical School for assistance in  
292 all flow cytometry experiments. We thank Hongtao Yu (Westlake University, China and  
293 University of Texas Southwestern Medical Center, United States) for helpful discussions on the  
294 internal tagging of MAD2, as well as Yibo Luo and Song-Tao Liu (University of Toledo, United  
295 States) for helpful discussions on mutations of MAD1's hinge.

## 296 Figure Legends

297

298 **Figure 1. The MAD1:MAD2 complex can assume a folded conformation *in vivo* enabled by**  
299 **the hinge of MAD1.**

300 (A) Representative models of the core region of the MAD1:MAD2 complex were predicted by  
301 the ColabFold advanced algorithm. The complex can assume either an extended (left) or a folded  
302 (right) conformation. The hinge is circled out. These predicted structures agree with published  
303 crystal structures, from which labeled length measurements were taken (PDB IDs: 1GO4, ref. <sup>13</sup>  
304 and 4DZO, ref. <sup>18</sup>). (B) A cartoon demonstrating how the folded conformation helps present the  
305 MIM of CDC20 to MAD2 that undergoes the conformational switch. The N-terminal region  
306 (containing BOX1 and the MIM) and C-terminal region (the WD40 fold) of CDC20 are  
307 represented by a light gray line and a light gray circle, respectively. The contact between  
308 CDC20's N-terminal region and MAD1 represents direct physical interaction <sup>16, 21, 40</sup>. All  
309 cartoons in this paper are not to scale. (C) The core region of the MAD1-  
310 mNG:MAD2 $\Delta$ mScarlet-I complex in a folded conformation predicted by the ColabFold  
311 advanced algorithm (left) and the average lifetime of MAD1-mNG in the *MAD1*-mNG genome-  
312 edited HeLa-A12 cell line or the *MAD1*-mNG/*MAD2* $\Delta$ mScarlet-I genome-edited HeLa-A12 cell  
313 line (right). The total number of cells in each group  $N = 7$ . Results are representative of two  
314 independent experiments. (D) (Left) Unsynchronized HeLa-A12 cells were treated with  
315 si*CDC20* or a control siRNA for 2 d and probed for CDC20, MAD1, and GAPDH (loading  
316 control). (Right) Same as (C), except that cells were treated with si*CDC20*. (E) (Top) Partial  
317 sequence of human wild-type MAD1 or MAD1 $\Delta$ L. (Bottom left) A representative model of the  
318 core region of the MAD1 $\Delta$ L:MAD2 complex predicted by the ColabFold advanced algorithm.  
319 (Bottom right) The average lifetime of exogenous MAD1 $\Delta$ L-mNG and MAD1-mNG in the  
320 *MAD2* $\Delta$ mScarlet-I genome-edited HeLa-A12 cell line. The total number of cells in each group  $N$   
321  $\geq 17$ . Results are pooled from four independent experiments. In (C) to (E), each dot represents a  
322 single cell. Mean values  $\pm 95\%$  confidence intervals are overlaid. Unpaired *t*-tests with Welch's  
323 correction are performed in Prism (GraphPad Software). The following symbols for p-values are  
324 used in this paper: ns (not significant,  $p \geq 0.05$ ), \* ( $0.01 \leq p < 0.05$ ), \*\* ( $0.001 \leq p < 0.01$ ), \*\*\*  
325 ( $0.0001 \leq p < 0.001$ ), and \*\*\*\* ( $p < 0.0001$ ).

326 **Figure 2. The rate of MCC assembly is lower in the presence of MAD1 $\Delta$ L than in the**  
327 **presence of wild-type MAD1 *in vitro*.**

328 (A) Partial sequence of wild-type or mutant human MAD1. The hinge (582– 600) is underlined.  
329 (B) The addition of MBP-MAD1 $\Delta$ L:MAD2 (green) causes a moderate decrease in the rate of  
330 MCC assembly compared to the wild-type (blue). (C–D) MBP-MAD1:MAD2 (yellow) and  
331 MBP-MAD1 $\Delta$ L:MAD2 (green) have similar MCC assembly rates (C) in the absence of  
332 BUB1:BUB3 or (D) when CDC20<sup>BOX1-Glu</sup> is used in the reaction instead of wild-type  
333 CDC20. (E) MBP-MAD1(AL11):MAD2 (magenta) can promote MCC assembly *in vitro*  
334 similarly to wild-type MBP-MAD1:MAD2 (blue). In (B) to (E), curves report single  
335 measurements are representative of at least three independent technical replicates. The y-axis  
336 represents the normalized emission intensity of the acceptor. Prism was used for data analysis  
337 and visualization. (F) MBP or MBP-MAD1(wild-type or mutant):MAD2 is immobilized on  
338 amylose beads and serves as baits to pull down preys including O-MAD2 (a V193N mutant that  
339 stabilizes MAD2 in the open conformation <sup>28</sup>), MPS1-phosphorylated BUB1:BUB3, and  
340 CDC20. From top to bottom: a Coomassie-stained SDS-PAGE gel, an immunoblot detecting  
341 BUB1, and an immunoblot detecting CDC20.

342 **Figure 3. The structural flexibility provided by the hinge of MAD1 is critical to the SAC**  
343 **signaling activity *in vivo*.**

344 (A) The first two columns on the left used the *MAD1*-mNG genome-edited HeLa-A12 cell line  
345 which served as a reference for the endogenous level of MAD1 (see Methods). *In situ* tagging of  
346 MAD1 did not affect the 3'-UTR which si*MAD1*'s target. The effectiveness of si*MAD1*'s against  
347 the *MAD1*-mNG allele was confirmed by the greatly diminished green channel fluorescence  
348 signal (data not shown). The two columns on the right used HeLa-A12 cell lines treated with  
349 si*MAD1*'s and induced to express exogenous MAD1-mNG or MAD1 $\Delta$ L-mNG. Each dot  
350 represents a cell ( $N \geq 50$  in each group). (B) In the predicted structure of the core region of the  
351 MAD1:MAD1 $\Delta$ L heterodimer (in complex with MAD2, using the ColabFold advanced  
352 algorithm), the hinge of the wild-type copy introduces a bulge but the overall conformation is  
353 extended due to the stiffness of the now fused  $\alpha$ -helix of MAD1 $\Delta$ L. (C) As in (A), the first two  
354 columns on the left used the *MAD1*-mNG genome-edited HeLa-A12 cell line which served as a

355 reference for the endogenous level of MAD1. The two columns on the right used HeLa-A12 cell  
356 lines treated with siMAD1's and induced to express exogenous MAD1(AL11)-mNG or  
357 MAD1(Lmut)-mNG. Each dot represents a cell ( $N \geq 75$  in each group). In (A) and (C), results  
358 were pooled from at least two technical repeats. The mean value  $\pm$  the 95% confidence interval  
359 of each group is overlaid. Unpaired *t*-tests with Welch's correction are performed in Prism.

#### 360 **Figure 4. A cartoon of the “knitting” model**

361 The structural flexibility of MAD1 facilitates the spatio-temporal coupling of the MAD2  
362 conformational switch and the assembly of CDC20:MAD2. The two solid black arrows indicate  
363 the formation and release of CDC20:MAD2, respectively. According to Figures 2C and S2D, the  
364 difference in the MCC assembly rate (comparing MAD1 with MAD1 $\Delta$ L) relies on the  
365 interaction between MAD1 and BUB1. Therefore, this cartoon of our model also incorporates  
366 BUB1 and highlights the following protein-protein interactions involving BUB1: (1) T461-  
367 phosphorylated BUB1 CM1 interacts with MAD1's consensus RLK motif located within the  
368 coiled-coil leading up to the RWD domain<sup>21, 45</sup>; (2) the C-terminus of BUB1 CM1 contacts the  
369 RWD domain of the opposite MAD1<sup>45</sup>; (3) BUB1 interacts with CDC20 through multiple motifs  
370 cooperatively, including the ABBA motif (527–532, which binds between blades 2 and 3 of  
371 CDC20's seven-bladed WD40 fold) and the consensus KEN box (C-terminal to the ABBA  
372 motif, which likely binds to the center of CDC20's WD40)<sup>16, 46, 47</sup>.

373

#### 374 **Figure S1. Internally tagged MAD2 is functional in both budding yeast and human cells.**

375 (A) A representative model of *Saccharomyces cerevisiae* Mad2 $\Delta$ GFP (left; internally tagged  
376 within the  $\beta$ 5- $\alpha$ C loop) and human MAD2 $\Delta$ mScarlet-I (right; internally tagged within the  $\beta$ 5- $\alpha$ C  
377 loop) predicted by the ColabFold advanced algorithm. (B) Effects of Nocodazole treatment on  
378 the *mad2 $\Delta$*  *S. cerevisiae* strain or the *mad2 $\Delta$*  strain expressing Mad2 $\Delta$ GFP. The graphs show the  
379 quantification of cellular DNA content using flow cytometry 0-4 h after supplementing the  
380 growth media with DMSO (gray) or nocodazole (red). Normal interphase cells are haploids  
381 whose DNA content corresponds to “N”. Representative results from two experiments were  
382 shown. (C) Diagram of the endogenous MAD2 allele and the genome-edited MAD2 $\Delta$ mScarlet-I



383 allele. Boxes 1–5 represent the exons. The regions between these boxes represent the introns.  
384 Boxes 2'–5' encode the same peptides as boxes 2–5 respectively, with the introduction of certain  
385 silence mutations that make the exogenous MAD2 $\Delta$ mScarlet-I resistant to siMAD2. The black  
386 “P” arrow represents the promoter and the 5'-UTR. The black “Ter” bar represents the 3'-UTR  
387 and the polyadenylation signal. The gray “Ter\*” bar represents the polyadenylation signal of  
388 rabbit  $\beta$ -globin. The red stop signs represent stop codons. The sequence of the MAD2 $\Delta$ mScarlet-  
389 I allele was confirmed by genotyping and Sanger sequencing (data not shown). (D)  
390 Immunoblotting showed that MAD2 $\Delta$ mScarlet-I (labeled by an asterisk, with an expected  
391 molecular weight of 51.0 kDa) was correctly expressed in the heterozygous MAD2 $\Delta$ mScarlet-I  
392 HeLa-A12 cell line and was resistant against siMAD2. As a comparison, wild-type MAD2  
393 (labeled by a cruciform with a molecular weight of 23.5kDa) was effectively knocked down by  
394 siMAD2. The immunoblot against GAPDH served as the loading control. (E) Unsynchronized  
395 cells were treated with respective siRNAs for one day, treated with 50 nM nocodazole. Each  
396 gray dot represents a cell. The total number of cells in each group  $N > 140$ . Mean values  $\pm 95\%$   
397 confidence intervals are overlaid. Results are representative of two independent experiments.  
398 Unpaired  $t$ -tests with Welch’s correction are performed in Prism.

399 **Figure S2. The secondary structure of the hinge of MAD1 is well conserved.**

400 (A) MBP-MAD1(wild-type or  $\Delta$ L):MAD2 visualized by electron microscopy after glycerol  
401 spraying and low-angle platinum shadowing. Scale bars, 50 nm. (B) The primary sequence of  
402 MAD1’s hinge is not conserved. Jalview is used in the multiple sequence alignment (using the  
403 MSAProbs alignment tool with default settings) and visualization (Waterhouse et al. 2009) and  
404 the coloring scheme of Clustal X is applied. The amino-acid residue numbering at the top is for  
405 human MAD1. (C) The presence of this flexible hinge in the C-terminus of MAD1 is conserved  
406 and proline residues (colored yellow) are usually present within this region. The figure shows  
407 coiled-coil predictions by two algorithms (blue curves: raw predicted probabilities by  
408 DeepCoil2; black curves: MARCOIL) on the region spanning from MAD1’s MIM (which is also  
409 not a coiled-coil<sup>13</sup>) to MAD1’s consensus RLK motif from *Homo sapiens* (human), *Mus*  
410 *musculus* (mouse), *Danio rerio* (zebrafish), *Xenopus Laevis* (African clawed frog),  
411 *Saccharomyces cerevisiae* (budding yeast), and *Schizosaccharomyces pombe* (fission yeast). The  
412 RLK motif directly binds to BUB1<sup>21, 45</sup> and is located within the coiled-coil leading to the RWD

413 domain (see the crystal structure on the right in Figure 1A). The primary sequences of full-length  
414 MAD1 proteins were supplied as the input, but only probability predictions for the region  
415 spanning from the MIM to the RLK motif are shown. Similar prediction results were obtained  
416 using PSIPRED 4.0<sup>48,49</sup>, although the exact starting and ending residues of the flexible hinge  
417 may differ (data not shown). In both (B) and (C), the segment encompassing residues 582–600 of  
418 human MAD1 is underlined. (D) MCC FRET-sensor-based assays show that when BUB1 $\Delta$ CM1  
419 is used instead of wild-type BUB1, MBP-MAD1:MAD2 (yellow) and MBP-MAD1 $\Delta$ L:MAD2  
420 (green) have a similar decreased activity in promoting MCC assembly. Curves report single  
421 measurements representative of at least three independent technical replicates. Prism was used  
422 for data analysis and visualization.

423 **Figure S3. Deletion of the hinge does not affect the localization of the MAD1:MAD2**  
424 **complex or the expression level of MCC constituents.**

425 (A) MAD1 has a long half-life under normal conditions<sup>50</sup>. And like BUB1<sup>51-53</sup>, even a small  
426 pool of MAD1 (at less than 10% of its physiological concentration as quantified from Figure  
427 S3B) can maintain a considerable level of SAC signaling activity in nocodazole-treated cells.  
428 The conditions of siMAD1 treatment were (from left to right): untreated, 40nM each for two days  
429 (the standard condition used throughout this study), 100 nM each for two days, 100 nM each on  
430 day one and 100 nM each again on day two. The MAD1-mNG genome-edited HeLa-A12 cell  
431 line was used in each group. Each dot represents a cell ( $N \geq 145$  in each group). The mean value  
432  $\pm$  the 95% confidence interval of each group is overlaid. Welch's ANOVA test [ $W(DFn, DFd) =$   
433  $0.9885(2.000, 298.9), p = 0.3733$ ] was performed for the three columns on the right. The  
434 ANOVA test and the unpaired  $t$ -test with Welch's correction are performed in Prism. (B)  
435 Knockdown of the endogenous MAD1 by siMAD1's had an efficiency of over 90% based on the  
436 intensity of the residual MAD1 band. The cellular abundance of either BUBR1, CDC20, or  
437 BUB3 was not affected. The immunoblot against GAPDH served as the loading control. (C) The  
438 MAD2 $\Delta$ mScarlet-I genome-edited HeLa-A12 treated with siMAD1's and rescued by  
439 MAD1(WT/ $\Delta$ L)-mNG were imaged using wide-field fluorescence microscopy. Cells were  
440 arrested at mitosis using a thymidine–nocodazole synchronization protocol. Representative  
441 micrographs are shown in the top panel. Maximum  $z$ -projected green channel images shown here  
442 share the same LUT. Maximum  $z$ -projected red channel images shown here also share the same

443 LUT. Scale bar, 10  $\mu\text{m}$ . Due to various expression levels of induced MAD1(WT/ $\Delta$ L)-mNG in  
444 different cells, signaling kinetochores were filtered by the localization of MAD1(WT/ $\Delta$ L)-mNG  
445 (with an arbitrary threshold of 1000–7000AU). Each gray dot represents a single signaling  
446 kinetochore ( $N \geq 85$  in each group). The mean value  $\pm$  the 95% confidence interval of each group  
447 is overlaid. Unpaired *t*-tests with Welch's correction are performed in Prism. (D) Using  
448 immunoblotting to evaluate the immunoprecipitation by the mNeonGreen-Trap Agarose. The  
449 cruciform symbol represents the endogenous MAD1 band. The expected molecular weights of  
450 the exogenous MAD1-mNG, MAD1 $\Delta$ L-mNG, and mNeonGreen are 110.2 kDa, 108.4 kDa, and  
451 26.9 kDa, respectively. The immunoblot against GAPDH served as the loading control. The  
452 immunoblots shown here are from the same immunoprecipitation experiment representative of  
453 two independent repeats.

454 **Figure S4. Coiled-coil predictions of MAD1(Lmut/AL11) reveal similar propensity profile**  
455 **as wild-type MAD1.**

456 (A) The two algorithms and legends are the same as in Figure S2C. The top panel is reproduced  
457 from Figure S2C. Segments encompassing residues 582–600 are underlined. Serine/threonine  
458 residues are colored green. Proline residues are colored yellow. Negatively charged residues are  
459 colored purple. Lysine residues are colored red. (B) Immunoblot analysis of mitotic lysates of  
460 HeLa-A12 cells (first lane from the left) or HeLa-A12 cells expressing exogenous MAD1-mNG  
461 (second lane), MAD1(AL11)-mNG (third lane), or MAD1(Lmut)-mNG (fourth lane). Cells were  
462 treated with labeled siRNAs and 0.1  $\mu\text{g}/\text{mL}$  doxycycline for two days. Cells were synchronized  
463 by 2.5 mM thymidine overnight, released for 7 h, and treated with 330nM nocodazole for 4h  
464 before being harvested by the mitotic shake-off technique. The expected molecular weights of  
465 the exogenous MAD1-mNG, MAD1(AL11)-mNG, and MAD1(Lmut)-mNG are 110.2 kDa,  
466 109.7 kDa, and 110.0 kDa, respectively. Ponceau S staining (bottom panel) of the MAD1 blot  
467 serves as a control for sample loading and membrane transfer.

468

## 469 References

- 470 1. Sudakin, V., Chan, G.K. & Yen, T.J. Checkpoint inhibition of the APC/C in HeLa cells is  
471 mediated by a complex of BUBR1, BUB3, CDC20, and MAD2. *J Cell Biol* **154**, 925-936  
472 (2001).
- 473 2. Chao, W.C., Kulkarni, K., Zhang, Z., Kong, E.H. & Barford, D. Structure of the mitotic  
474 checkpoint complex. *Nature* **484**, 208-213 (2012).
- 475 3. Sudakin, V. *et al.* The cyclosome, a large complex containing cyclin-selective ubiquitin  
476 ligase activity, targets cyclins for destruction at the end of mitosis. *Mol Biol Cell* **6**, 185-  
477 197 (1995).
- 478 4. Alfieri, C. *et al.* Molecular basis of APC/C regulation by the spindle assembly checkpoint.  
479 *Nature* **536**, 431-436 (2016).
- 480 5. Yamaguchi, M. *et al.* Cryo-EM of Mitotic Checkpoint Complex-Bound APC/C Reveals  
481 Reciprocal and Conformational Regulation of Ubiquitin Ligation. *Mol Cell* **63**, 593-607  
482 (2016).
- 483 6. Clute, P. & Pines, J. Temporal and spatial control of cyclin B1 destruction in metaphase.  
484 *Nat Cell Biol* **1**, 82-87 (1999).
- 485 7. Yu, J. *et al.* Structural basis of human separase regulation by securin and CDK1-cyclin B1.  
486 *Nature* **596**, 138-142 (2021).
- 487 8. Chang, D.C., Xu, N. & Luo, K.Q. Degradation of cyclin B is required for the onset of  
488 anaphase in Mammalian cells. *J Biol Chem* **278**, 37865-37873 (2003).
- 489 9. Simonetta, M. *et al.* The influence of catalysis on mad2 activation dynamics. *PLoS Biol* **7**,  
490 e10 (2009).
- 491 10. Faesen, A.C. *et al.* Basis of catalytic assembly of the mitotic checkpoint complex. *Nature*  
492 (2017).
- 493 11. Luo, X., Tang, Z., Rizo, J. & Yu, H. The Mad2 spindle checkpoint protein undergoes similar  
494 major conformational changes upon binding to either Mad1 or Cdc20. *Mol Cell* **9**, 59-71  
495 (2002).
- 496 12. Luo, X. *et al.* Structure of the Mad2 spindle assembly checkpoint protein and its  
497 interaction with Cdc20. *Nat Struct Biol* **7**, 224-229 (2000).
- 498 13. Sironi, L. *et al.* Crystal structure of the tetrameric Mad1-Mad2 core complex:  
499 implications of a 'safety belt' binding mechanism for the spindle checkpoint. *EMBO J* **21**,  
500 2496-2506 (2002).
- 501 14. De Antoni, A. *et al.* The Mad1/Mad2 complex as a template for Mad2 activation in the  
502 spindle assembly checkpoint. *Curr Biol* **15**, 214-225 (2005).
- 503 15. Luo, X. *et al.* The Mad2 spindle checkpoint protein has two distinct natively folded  
504 states. *Nat Struct Mol Biol* **11**, 338-345 (2004).
- 505 16. Piano, V. *et al.* CDC20 assists its catalytic incorporation in the mitotic checkpoint  
506 complex. *Science* **371**, 67-71 (2021).
- 507 17. Lara-Gonzalez, P., Kim, T., Oegema, K., Corbett, K. & Desai, A. A tripartite mechanism  
508 catalyzes Mad2-Cdc20 assembly at unattached kinetochores. *Science* **371**, 64-67 (2021).

- 509 18. Kim, S., Sun, H., Tomchick, D.R., Yu, H. & Luo, X. Structure of human Mad1 C-terminal  
510 domain reveals its involvement in kinetochore targeting. *Proceedings of the National*  
511 *Academy of Sciences* **109**, 6549-6554 (2012).
- 512 19. Kruse, T. *et al.* A direct role of Mad1 in the spindle assembly checkpoint beyond Mad2  
513 kinetochore recruitment. *EMBO reports* **15**, 282-290 (2014).
- 514 20. Heinrich, S. *et al.* Mad1 contribution to spindle assembly checkpoint signalling goes  
515 beyond presenting Mad2 at kinetochores. *EMBO Rep* **15**, 291-298 (2014).
- 516 21. Ji, Z., Gao, H., Jia, L., Li, B. & Yu, H. A sequential multi-target Mps1 phosphorylation  
517 cascade promotes spindle checkpoint signaling. *Elife* **6** (2017).
- 518 22. Ji, W., Luo, Y., Ahmad, E. & Liu, S.T. Direct interactions of mitotic arrest deficient 1  
519 (MAD1) domains with each other and MAD2 conformers are required for mitotic  
520 checkpoint signaling. *J Biol Chem* **293**, 484-496 (2018).
- 521 23. Zhou, H.X. Polymer models of protein stability, folding, and interactions. *Biochemistry*  
522 **43**, 2141-2154 (2004).
- 523 24. Lapidus, L.J., Steinbach, P.J., Eaton, W.A., Szabo, A. & Hofrichter, J. Effects of Chain  
524 Stiffness on the Dynamics of Loop Formation in Polypeptides. Appendix: Testing a 1-  
525 Dimensional Diffusion Model for Peptide Dynamics. *The Journal of Physical Chemistry B*  
526 **106**, 11628-11640 (2002).
- 527 25. Jumper, J. *et al.* Highly accurate protein structure prediction with AlphaFold. *Nature*  
528 **596**, 583-589 (2021).
- 529 26. Mirdita, M., Steinegger, M., Breitwieser, F., Soding, J. & Levy Karin, E. Fast and sensitive  
530 taxonomic assignment to metagenomic contigs. *Bioinformatics* (2021).
- 531 27. Bindels, D.S. *et al.* mScarlet: a bright monomeric red fluorescent protein for cellular  
532 imaging. *Nat Methods* **14**, 53-56 (2017).
- 533 28. Mapelli, M., Massimiliano, L., Santaguida, S. & Musacchio, A. The Mad2 conformational  
534 dimer: structure and implications for the spindle assembly checkpoint. *Cell* **131**, 730-743  
535 (2007).
- 536 29. Hara, M., Ozkan, E., Sun, H., Yu, H. & Luo, X. Structure of an intermediate conformer of  
537 the spindle checkpoint protein Mad2. *Proc Natl Acad Sci USA* **112**, 11252-11257 (2015).
- 538 30. Kukreja, A.A., Kavuri, S. & Joglekar, A.P. Microtubule Attachment and Centromeric  
539 Tension Shape the Protein Architecture of the Human Kinetochore. *Curr Biol* **30**, 4869-  
540 4881 e4865 (2020).
- 541 31. Becker, W. Fluorescence lifetime imaging--techniques and applications. *J. Microsc.* **247**,  
542 119-136 (2012).
- 543 32. Ludwiczak, J., Winski, A., Szczepaniak, K., Alva, V. & Dunin-Horkawicz, S. DeepCoil-a fast  
544 and accurate prediction of coiled-coil domains in protein sequences. *Bioinformatics* **35**,  
545 2790-2795 (2019).
- 546 33. Delorenzi, M. & Speed, T. An HMM model for coiled-coil domains and a comparison with  
547 PSSM-based predictions. *Bioinformatics* **18**, 617-625 (2002).
- 548 34. Zimmermann, L. *et al.* A Completely Reimplemented MPI Bioinformatics Toolkit with a  
549 New HHpred Server at its Core. *J Mol Biol* **430**, 2237-2243 (2018).
- 550 35. Khandelja, P., Yap, K. & Makeyev, E.V. Streamlined platform for short hairpin RNA  
551 interference and transgenesis in cultured mammalian cells. *Proc Natl Acad Sci USA* **108**,  
552 12799-12804 (2011).

- 553 36. Ballister, E.R., Riegman, M. & Lampson, M.A. Recruitment of Mad1 to metaphase  
554 kinetochores is sufficient to reactivate the mitotic checkpoint. *J Cell Biol* **204**, 901-908  
555 (2014).
- 556 37. Chen, C. *et al.* Ectopic Activation of the Spindle Assembly Checkpoint Signaling Cascade  
557 Reveals Its Biochemical Design. *Curr Biol* **29**, 104-119 e110 (2019).
- 558 38. Alfonso-Perez, T., Hayward, D., Holder, J., Gruneberg, U. & Barr, F.A. MAD1-dependent  
559 recruitment of CDK1-CCNB1 to kinetochores promotes spindle checkpoint signaling. *J*  
560 *Cell Biol* **218**, 1108-1117 (2019).
- 561 39. Robinson, C.R. & Sauer, R.T. Optimizing the stability of single-chain proteins by linker  
562 length and composition mutagenesis. *Proc Natl Acad Sci USA* **95**, 5929-5934 (1998).
- 563 40. Fischer, E.S. *et al.* Juxtaposition of Bub1 and Cdc20 on phosphorylated Mad1 during  
564 catalytic mitotic checkpoint complex assembly. *bioRxiv*, 2022.2005.2016.492081 (2022).
- 565 41. Mi, H. *et al.* Protocol Update for large-scale genome and gene function analysis with the  
566 PANTHER classification system (v.14.0). *Nat Protoc* **14**, 703-721 (2019).
- 567 42. Zhang, Q.C., Petrey, D., Garzon, J.I., Deng, L. & Honig, B. PrePPI: a structure-informed  
568 database of protein-protein interactions. *Nucleic Acids Res* **41**, D828-833 (2013).
- 569 43. Rodriguez-Bravo, V. *et al.* Nuclear pores protect genome integrity by assembling a  
570 premitotic and Mad1-dependent anaphase inhibitor. *Cell* **156**, 1017-1031 (2014).
- 571 44. Lee, S.H., Sterling, H., Burlingame, A. & McCormick, F. Tpr directly binds to Mad1 and  
572 Mad2 and is important for the Mad1-Mad2-mediated mitotic spindle checkpoint. *Genes*  
573 *Dev* **22**, 2926-2931 (2008).
- 574 45. Fischer, E.S. *et al.* Molecular mechanism of Mad1 kinetochore targeting by  
575 phosphorylated Bub1. *EMBO Rep*, e52242 (2021).
- 576 46. Tian, W. *et al.* Structural analysis of human Cdc20 supports multisite degron recognition  
577 by APC/C. *Proc Natl Acad Sci USA* **109**, 18419-18424 (2012).
- 578 47. Di Fiore, B. *et al.* The ABBA Motif Binds APC/C Activators and Is Shared by APC/C  
579 Substrates and Regulators. *Developmental Cell* **32**, 358-372 (2015).
- 580 48. Jones, D.T. Protein secondary structure prediction based on position-specific scoring  
581 matrices. *J Mol Biol* **292**, 195-202 (1999).
- 582 49. Buchan, D.W.A. & Jones, D.T. The PSIPRED Protein Analysis Workbench: 20 years on.  
583 *Nucleic Acids Res* **47**, W402-W407 (2019).
- 584 50. Schweizer, N. *et al.* Spindle assembly checkpoint robustness requires Tpr-mediated  
585 regulation of Mad1/Mad2 proteostasis. *J Cell Biol* **203**, 883-893 (2013).
- 586 51. Raaijmakers, J.A. *et al.* BUB1 Is Essential for the Viability of Human Cells in which the  
587 Spindle Assembly Checkpoint Is Compromised. *Cell Rep* **22**, 1424-1438 (2018).
- 588 52. Rodriguez-Rodriguez, J.A. *et al.* Distinct Roles of RZZ and Bub1-KNL1 in Mitotic  
589 Checkpoint Signaling and Kinetochore Expansion. *Curr Biol* **28**, 3422-3429 e3425 (2018).
- 590 53. Zhang, G. *et al.* Efficient mitotic checkpoint signaling depends on integrated activities of  
591 Bub1 and the RZZ complex. *EMBO J* **38** (2019).

592



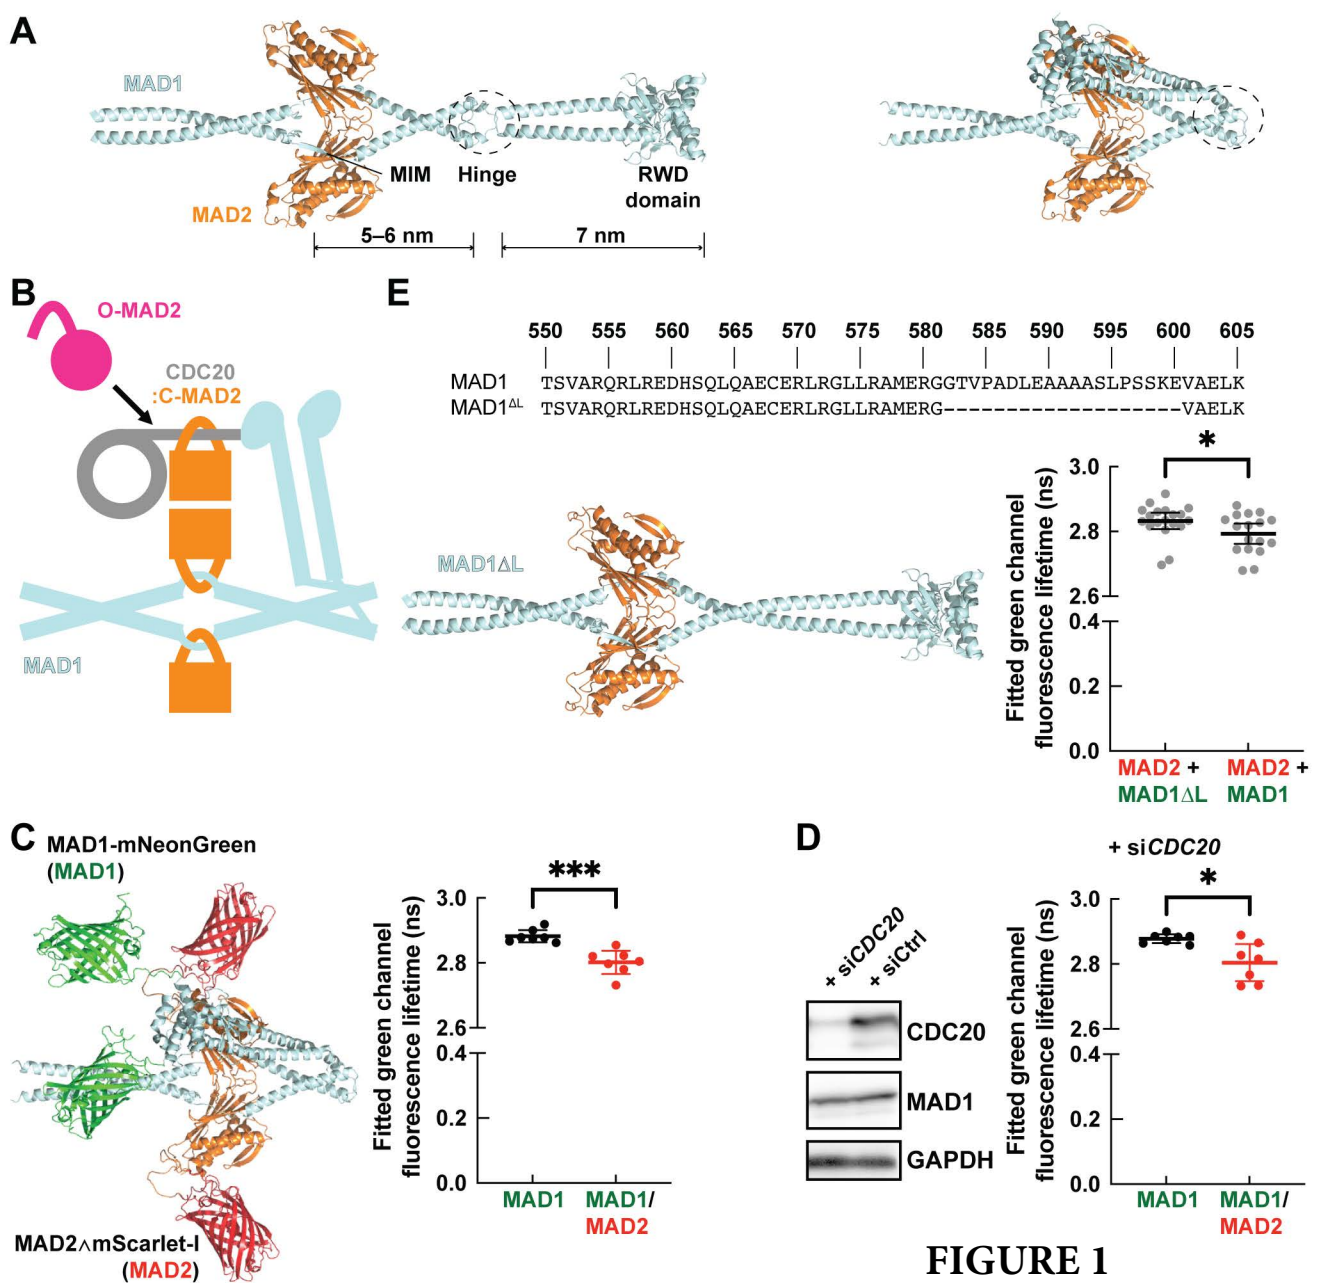

**FIGURE 1**



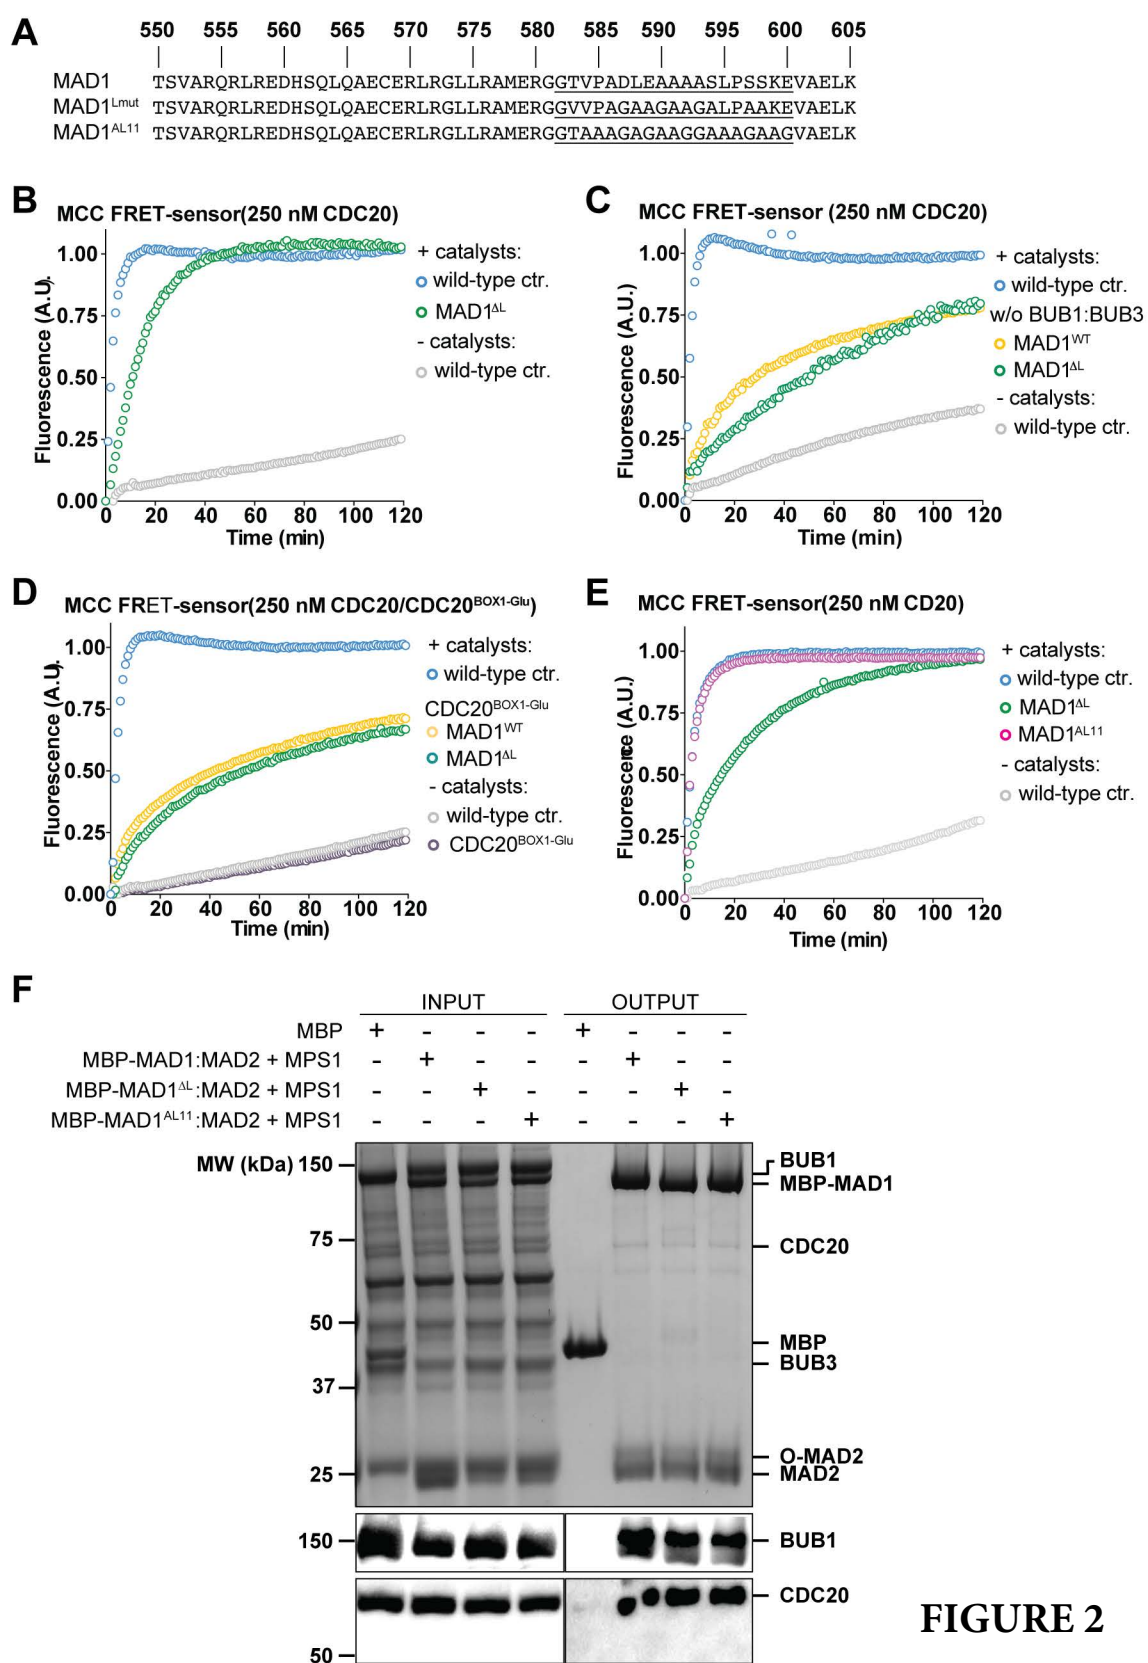

**FIGURE 2**

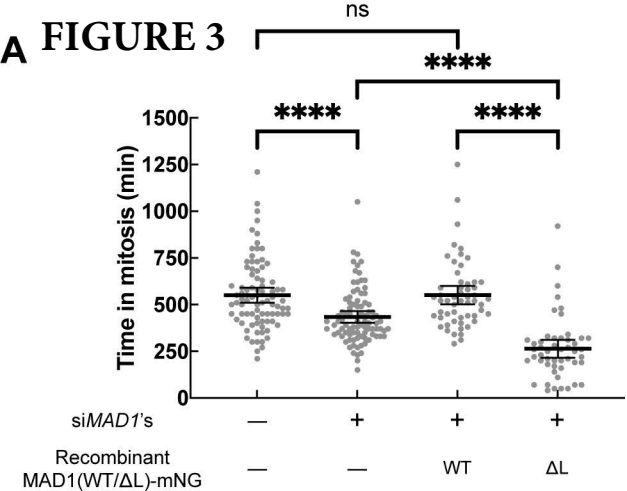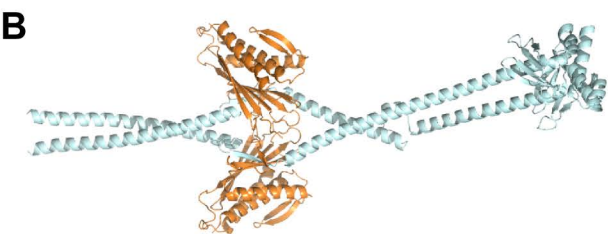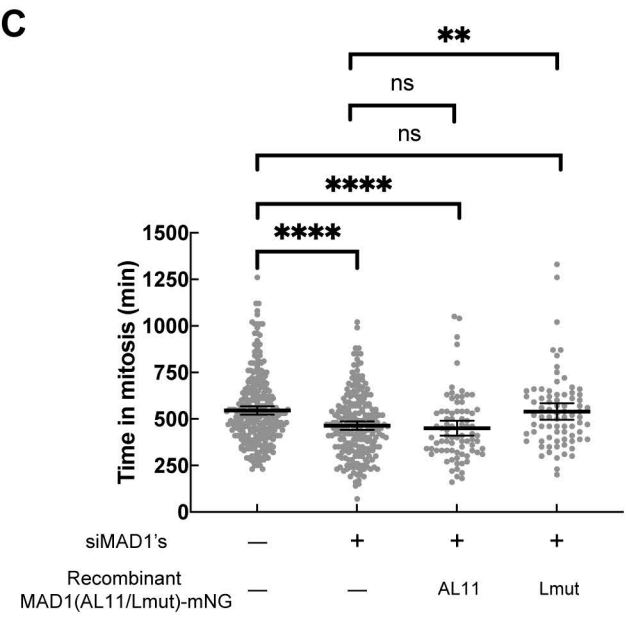

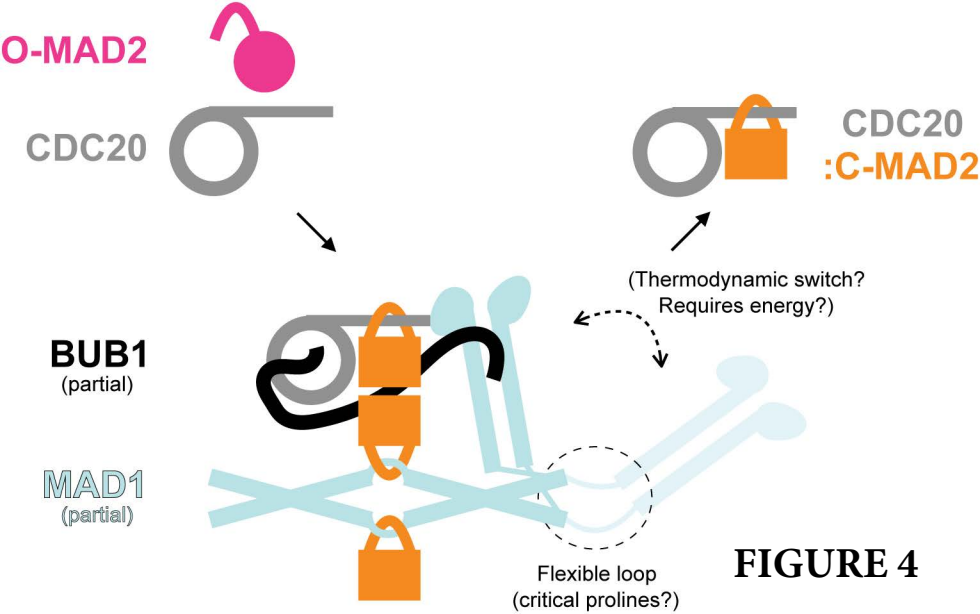

# A FIGURE S1

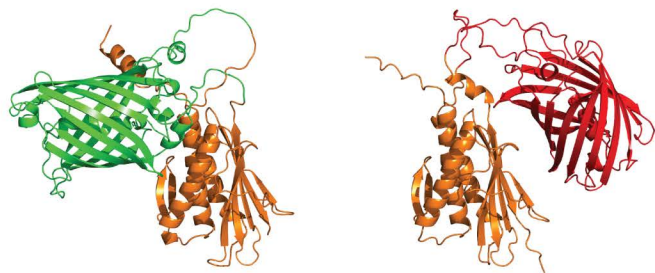

Budding yeast Mad2<sup>GFP</sup> Human MAD2<sup>mScarlet-I</sup>

# B

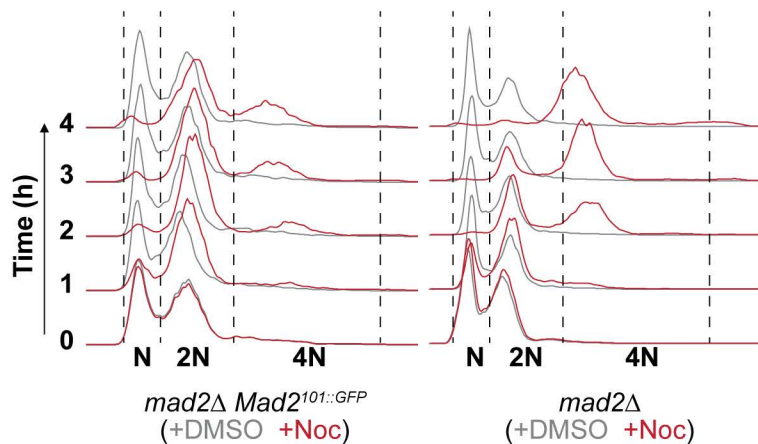

# C

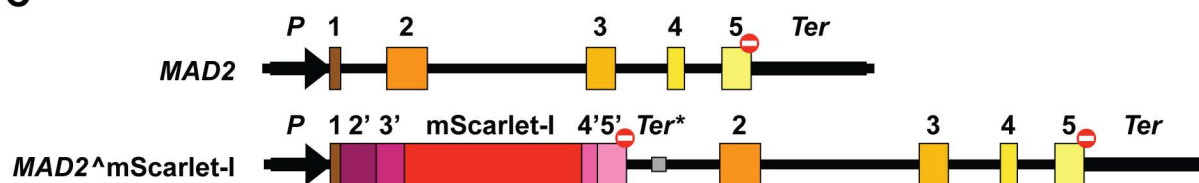

# D

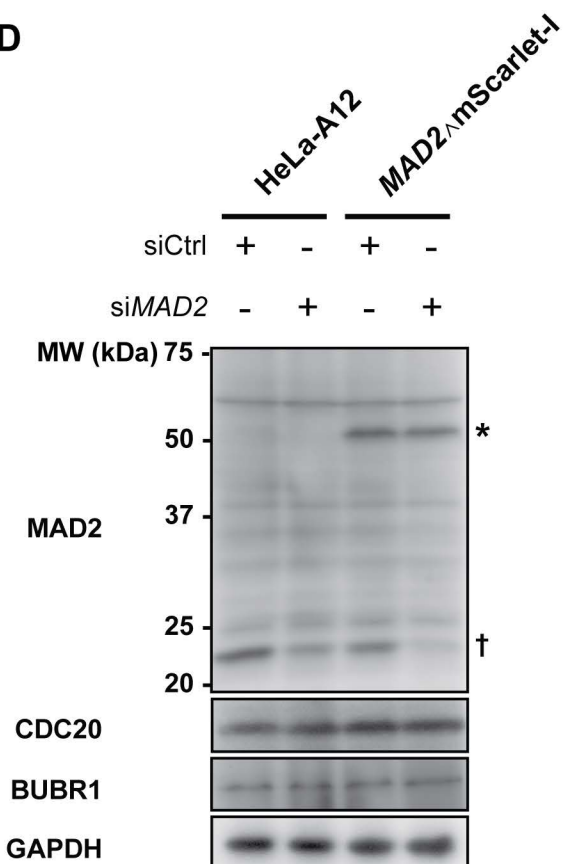

# E

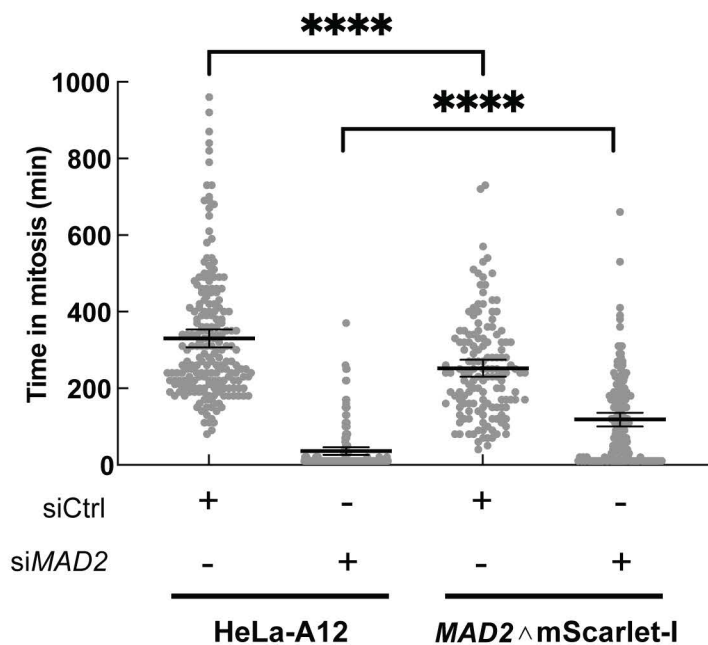

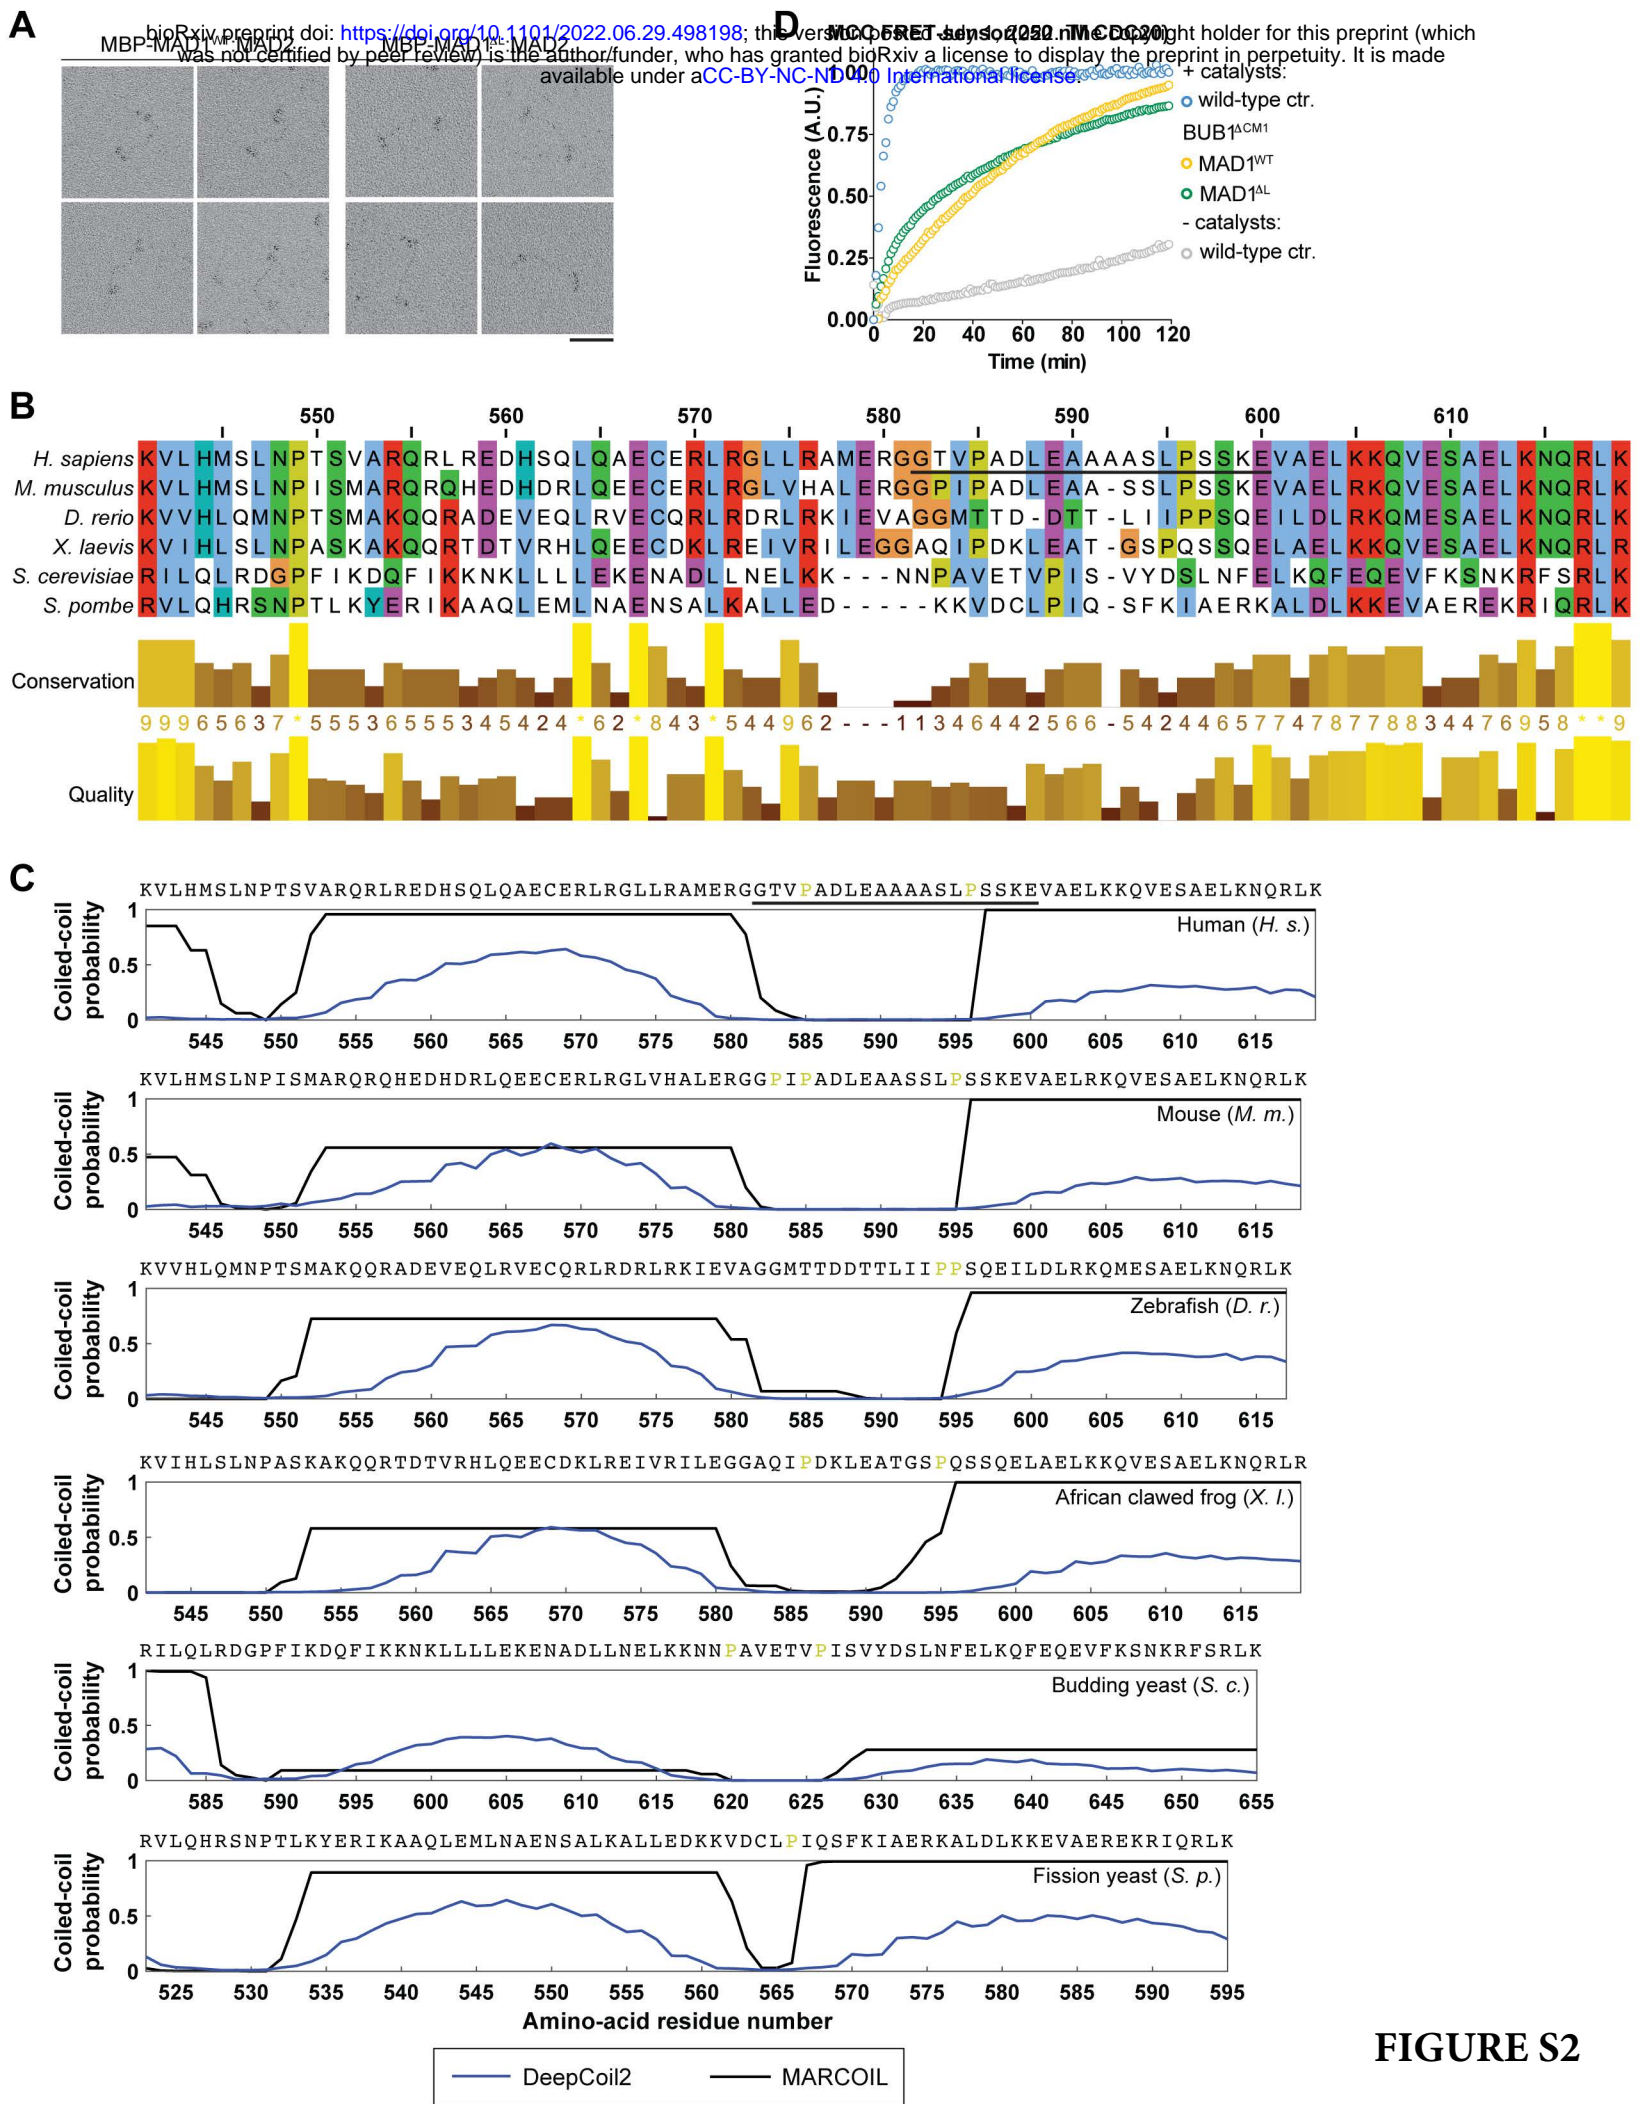

FIGURE S2



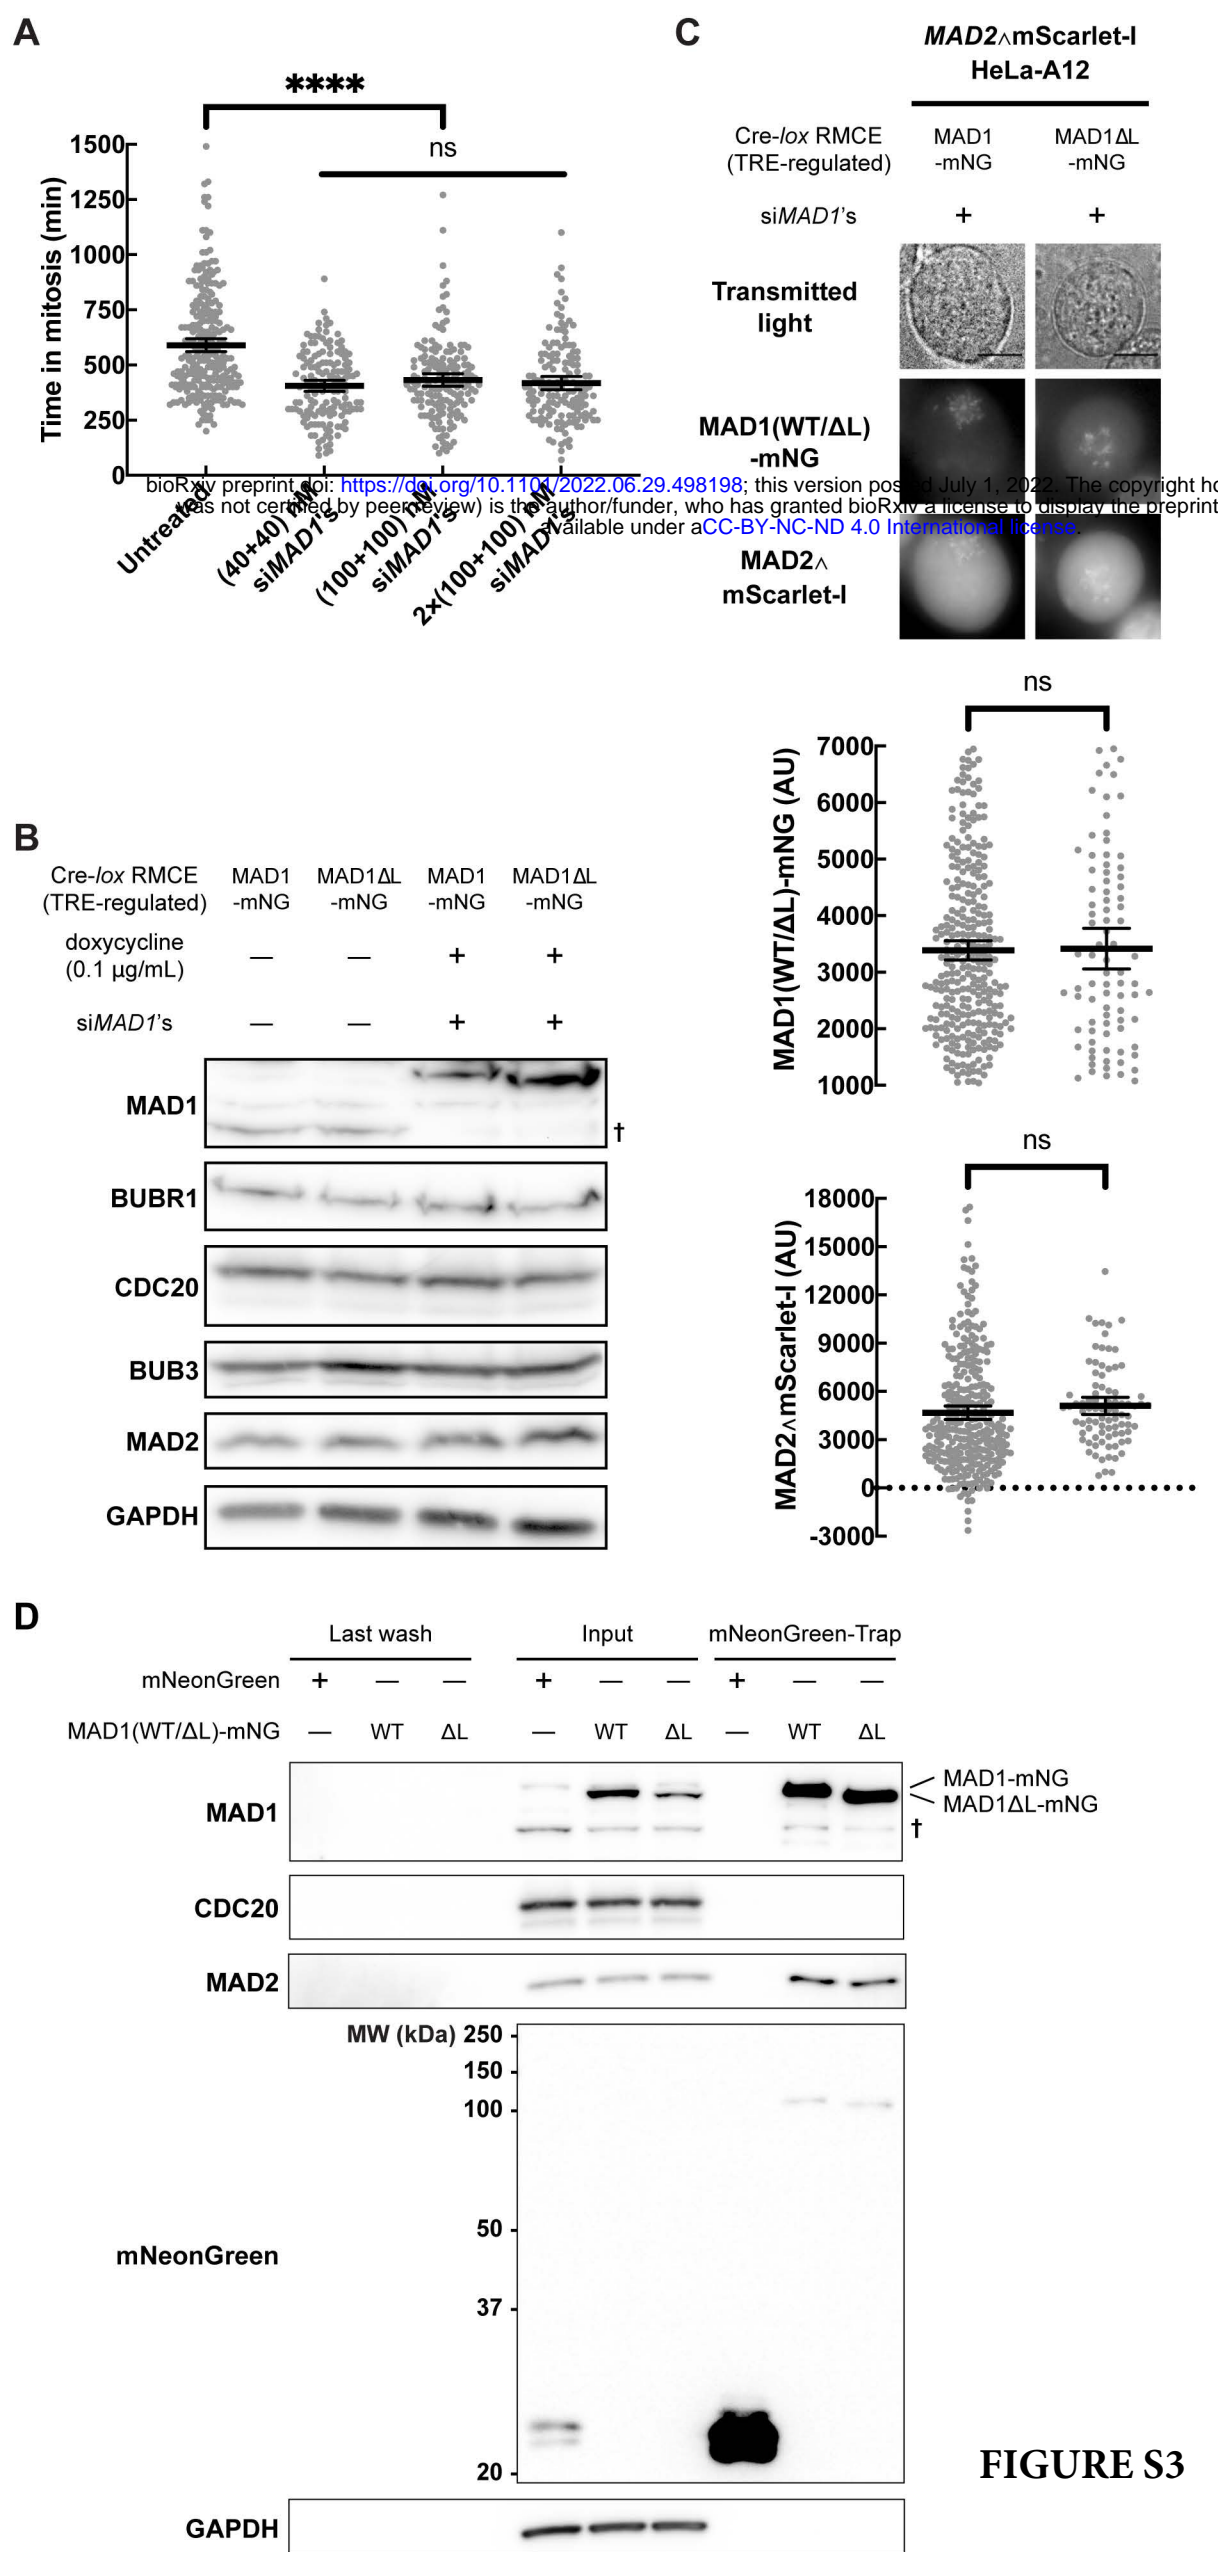

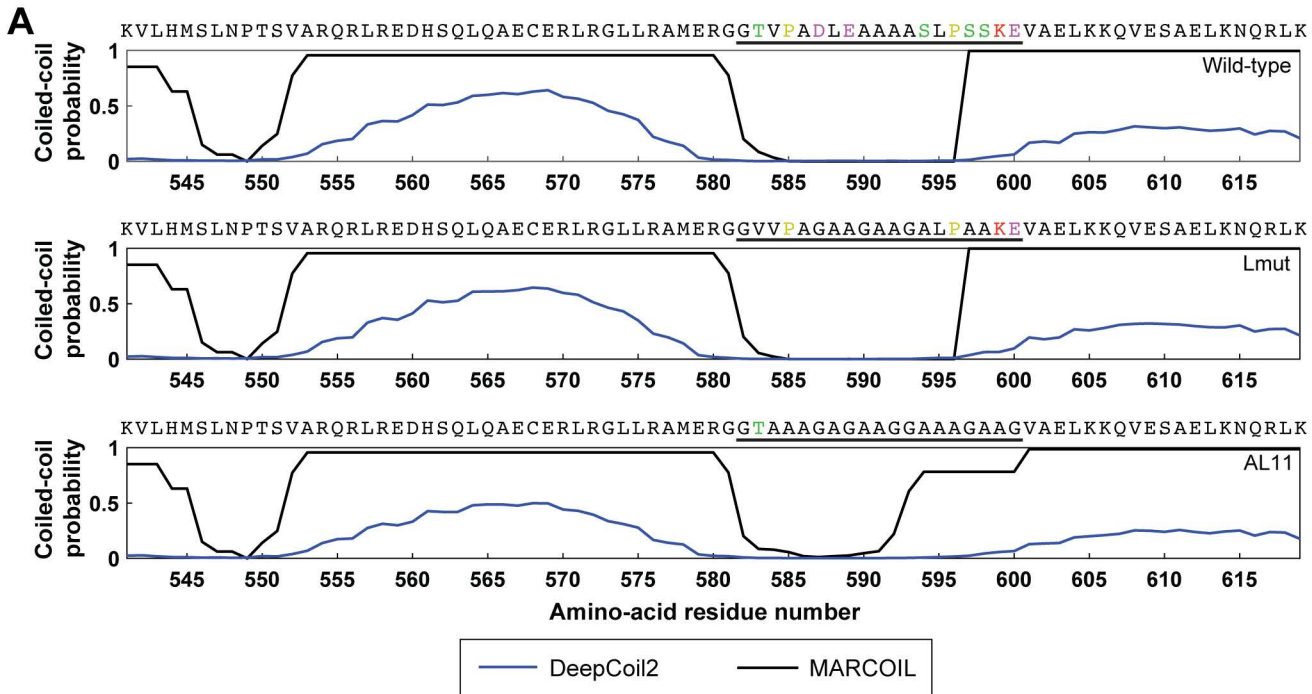

**B**

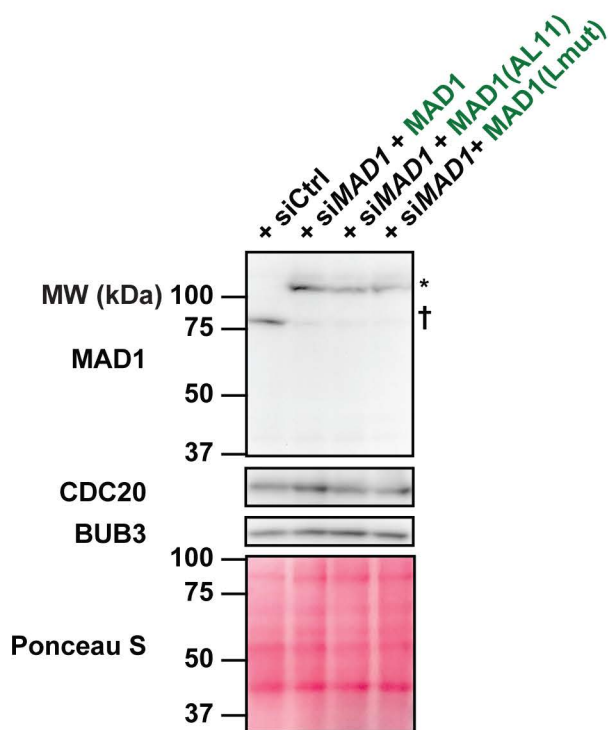

**FIGURE S4**



# The Structural Flexibility of MAD1 Facilitates the Assembly of the Mitotic Checkpoint Complex

Chu Chen<sup>1</sup>, Valentina Piano<sup>2, 3</sup>, Amal Alex<sup>2</sup>, Simon J. Y. Han<sup>4, 5</sup>, Pim J Huis In 't Veld<sup>2</sup>, Babhrubahan Roy<sup>4</sup>, Andrea Musacchio<sup>2, 6</sup>, Ajit P. Joglekar<sup>1, 4\*</sup>

<sup>1</sup> Biophysics, University of Michigan, Ann Arbor, Michigan, United States 48109

<sup>2</sup> Department of Mechanistic Cell Biology, Max Planck Institute of Molecular Physiology, Dortmund, Germany 44227

<sup>3</sup> Current address: Institute of Human Genetics, University Hospital Cologne, Cologne, Germany 50931

<sup>4</sup> Cell and Developmental Biology, University of Michigan Medical School, Ann Arbor, Michigan, United States 48109

<sup>5</sup> Current address: Medical Scientist Training Program, University of Cincinnati College of Medicine, Cincinnati, Ohio, United States 45267

<sup>6</sup> Centre for Medical Biotechnology, Faculty of Biology, University Duisburg-Essen, Essen, Germany

These authors contributed equally to this work: C.C. and V.P.

\* To whom correspondence should be addressed: A.P.J. ([ajitj@umich.edu](mailto:ajitj@umich.edu))

## Materials and methods

For methods of cell culture and Cre-*lox* RMCE, see [1]. Wide-field, *z*-stack fluorescence imaging used in the quantification of localization of MAD1(WT/ $\Delta$ L)-mNG and MAD2 $\Delta$ mScarlet-I at signaling kinetochores was the same as described in [2]. AlphaFold 2 structure predictions were conducted using the ColabFold advanced algorithm. All the parameters were set at their default values except for "max\_recycles" (which was set to 6) and "tol" (which was set to 0.1).

### Theoretical end-to-end root-mean-square distance of a flexible unstructured peptide

First, we model a flexible peptide with  $n$  amino acid residues using a 3-D random walk model (without considering steric hindrance and restrictions imposed by the Ramachandran plot). We denote the displacement of residue number  $i+1$  relative to residue number  $i$  as a random vector  $\mathbf{r}_i$ ,  $i = 1, 2, \dots, n-1$ . The end-to-end displacement,  $\mathbf{D}$ , can be expressed as

$$\mathbf{D} = \sum_{i=1}^{n-1} \mathbf{r}_i.$$

The root mean square of it is therefore

$$\sqrt{\langle |\mathbf{D}|^2 \rangle} = \sqrt{\langle (\sum_{i=1}^{n-1} \mathbf{r}_i) \cdot (\sum_{i=1}^{n-1} \mathbf{r}_i) \rangle} = \sqrt{\sum_{i=1}^{n-1} \langle |\mathbf{r}_i|^2 \rangle + \sum_{i \neq j} \langle \mathbf{r}_i \cdot \mathbf{r}_j \rangle}$$

For a 3-D random walk, the random vectors representing each step are independent of each other. Therefore,  $\forall i \neq j$ ,

$$\langle \mathbf{r}_i \cdot \mathbf{r}_j \rangle = 0.$$

Suppose that the contour length of each amino acid residue is universal ( $|\mathbf{r}_i| = r$ ,  $i = 1, 2, \dots, n-1$ ; according to [3], we take  $r = 0.37$  nm here), we have

$$\sqrt{\langle |\mathbf{D}|^2 \rangle} = \sqrt{n-1} \cdot r = \frac{L}{\sqrt{n-1}},$$

wherein  $L = (n-1)r$  is the contour length of the peptide.

Second, we model the same peptide using a worm-like chain model. This model considers the peptide as a continuous worm-like chain rather than a discrete, step-by-step walk in the previous model. According to [4], the end-to-end root-mean-square distance

$$\sqrt{\langle |\mathbf{D}|^2 \rangle} = \sqrt{2pL[1 - \frac{p}{L}(1 - e^{-\frac{L}{p}})]},$$

wherein  $p$  is the persistence length, a metric for the stiffness of the chain. According to [4, 5], we take  $p = 0.3-0.7$  nm here.

### Purification of recombinant proteins

Wild-type or mutant constructs of MAD1:MAD2, MAD2, MPS1, BUB1:BUB3, CDC20, and BUBR1:BUB3 are of human origin. The constructs of MBP-MAD1 $\Delta$ L:MAD2 and MBP-MAD1(AL11):MAD2 are cloned via site-directed mutagenesis from the MBP-MAD1:MAD2 wild-type construct used in [6, 7]. All recombinant proteins used in this study have been expressed and purified according to the protocols described in [6, 7].

## Low-angle metal shadowing and electron microscopy

MBP-MAD1(wild-type or  $\Delta$ L):MAD2 was diluted 1 : 1 with a spraying buffer (200 mM ammonium acetate and 60% glycerol) to a final concentration of 0.5–1.0  $\mu$ M and air-sprayed onto freshly cleaved mica pieces (V1 quality, Plano GmbH). Specimens were mounted and dried in a MED020 high-vacuum metal coater (Bal-tec). A platinum layer of approximately 1 nm and a 7-nm carbon support layer were subsequently evaporated onto the rotating specimen at angles of 6–7° and 45°, respectively. Pt/C replicas were released from the mica on water, captured by freshly glow-discharged 400-mesh Pd/Cu grids (Plano GmbH), and visualized using a LaB6 equipped JEM-1400 transmission electron microscope (JEOL) operated at 120 kV. Images were recorded at a nominal magnification of 60,000 $\times$  on a 4k $\times$ 4k CCD camera F416 (TVIPS).

## FRET assay with the MCC FRET-sensor

The MCC FRET-sensor has been described previously [6, 7]. The catalysts preparation consisted of 2  $\mu$ M MBP-MAD1(wild-type or mutant):MAD2 and 2  $\mu$ M BUB1(wild-type or mutant):BUB3, which were separately incubated with 500 nM MPS1 in the assay buffer [10 mM HEPES (pH 7.5), 150 mM NaCl, 2.5% glycerol, and 10 mM  $\beta$ -mercaptoethanol] supplemented with 1 mM ATP and 10 mM MgCl<sub>2</sub> for 16 h at 4 °C. All assays were performed using 100 nM final concentration of all proteins, except for CDC20, which was added at 250 nM (instead of 500 nM used in previous studies [6, 7]). The fluorophores MAD2-TAMRA and mTurquoise-BUBR1(1-571):BUB3 were added before measurements started. All measurements were performed on a CLARIOstar plate reader (BMG Labtech), using UV-Star 96-well plates (Greiner). The reactions had a final volume of 100  $\mu$ l in the assay buffer. The excitation light and emitted fluorescence were filtered by a 430-10 nm excitation filter, an LP 504 nm dichroic mirror, and a 590-20 nm emission filter. The plate reader read at a 60 s interval for 120 min (6 mm focal height, 200 flashes, gain 1200) and mix the reactions for 5 s at 500 rpm after each measurement.

## Flow cytometry

The complete genotype of the *mad2 $\Delta$  S. cerevisiae* strain (AJY4951, [8]) is *leu2 $\Delta$ -1, trp1 $\Delta$ 63, ura3-52, his3 $\Delta$ 200, lys2-8 $\Delta$ 1, mad2 $\Delta$ ::TRP1*. The complete genotype of the Mad2 $\Delta$ GFP-expressing *S. cerevisiae* strain (AJY5041, constructed in this study) is *leu2 $\Delta$ 0, met15 $\Delta$ 0, ura3 $\Delta$ 0, mad2 $\Delta$ ::KAN, Mad2<sup>101::GFP</sup> (HIS3)*.

Yeast strains were grown to mid-log phase and then 15  $\mu$ g/mL nocodazole was added to the media. Sample aliquots containing  $\sim 2 \times 10^6$  cells were collected 0, 1, 2, 3, and 4 h after the addition of nocodazole. Samples were fixed by 70% ethanol and then stored at 4 °C overnight. On day two, samples were washed and treated with 170 ng/mL bovine pancreatic RNase (Millipore Sigma) at 37 °C for one day in the RNase buffer [10 mM Tris (pH 8.0) and 15 mM NaCl]. On day three, samples were washed again, resuspended in PBS, and stored at 4 °C. The samples were treated with 5 mg/ml propidium iodide (Millipore Sigma) for 2 h at room temperature and subject to flow cytometry on an LSRFortessa Cell Analyzer (BD Biosciences). Data were analyzed using FlowJo.

## Generating the MAD2 $\Delta$ mScarlet-I genome-edited HeLa-A12 cell line

The gRNA used in the integration of the coding sequence of MAD2 $\Delta$ mScarlet-I (intron-free, stop codon-containing, and siMAD2-resistant by the introduction of silent mutations) and the polyadenylation signal of rabbit  $\beta$ -globin after the first exon of the endogenous *MAD2* gene was 5'-UCGCC CAGGCCAAUAUAUCG-3'. Synthesis of the sgRNA and assembly of the *Sp*Cas9-sgRNA RNP complex

were described in [9]. Plain or *MAD1*-mNG genome-edited HeLa-A12 cell lines were co-transfected with the RNP complex and linearized pCC35, sorted, and validated as described in [9]. A successfully edited *MAD2*ΔmScarlet-I allele encodes an internally-tagged MAD2 protein, wherein wild-type MAD2 and mScarlet-I are separated by short flexible linkers (AGSGGGAS between S114 of MAD2 and the N-terminus of mScarlet-I; GTGAGSA between the C-terminus of mScarlet-I and A115 of MAD2).

## RNA interference

The two siRNAs targeting the 3'-UTR of *MAD1* were from [10]. They were applied to unsynchronized cells at a concentration of 40 nM each for two days before imaging or collecting cells for immunoblotting unless specified otherwise. The sense-strand sequence of si*CDC20* was 5'-GGAGCUCAUCUCAGGCCAU-3' [11], which was applied at a concentration of 40 nM for two days before FLIM or immunoblotting. The sense-strand sequence of si*MAD2* was 5'-GGAAGAGUCGGGACCACAGUU-3' [12], which was applied at a concentration of 40 nM for one day before imaging or immunoblotting. Desalted siRNAs modified by double-deoxythymidine overhangs at 3'-ends of both strands were synthesized by Sigma. AllStars Negative Control siRNA (QIAGEN) is used as the control siRNA (siCtrl) and applied at the same dosage and time as the corresponding experimental group(s). All siRNAs were transfected into the cells via Lipofectamine RNAiMAX following manufacturer's instructions.

## Fluorescence lifetime imaging microscopy (FLIM)

All FLIM data were collected on an Alba v5 Laser Scanning Microscope, connected to an Olympus IX81 inverted microscope main body [equipped with a UPLSAPO60XW objective (1.2 NA)]. A Fianium WL-SC-400-8 laser with an acousto-optic tunable filter was used to generate excitation pulses at a wavelength of 488 nm and a frequency of about 20 MHz. Excitation light was further filtered by a Z405/488/561/635rpc quadband dichroic mirror. The emission light of the green channel was redirected by a 562 longpass dichroic mirror (FF562-Di03, Semrock), filtered by an FF01-531/40-25 filter, and finally detected by an SPCM-AQRH-15 avalanche photodiode. The time-correlated single photon counting module to register detected photon events to excitation pulses was SPC-830. Data acquisition was facilitated by VistaVision.

The emission light was redirected by a 562 longpass dichroic mirror and filtered by an FF01-582/75-25 filter (Semrock). The data analysis pipeline (implemented in MATLAB) developed in this study is publicly available on <https://github.com/CreLox/FluorescenceLifetime>.

To demonstrate how fluorescence lifetime measurements can quantify the FRET efficiency, consider donor fluorophores with a lifetime of  $\tau_0$ . In the absence of acceptor fluorophores, the exponential decay  $D_0$  of donor fluorescence after the pulse excitation at time zero is

$$D_0(t) = Ce^{-\frac{t}{\tau_0}}$$

and the total fluorescence signal is

$$S_0 = \int_0^{+\infty} D_0(t)dt = C\tau_0,$$

wherein  $C$  is a constant determined by the excitation and detection condition, the total number and properties of fluorophores, and the imaging setup. Without altering any of these conditions, in the presence of acceptor fluorophores and FRET, the longer a donor fluorophore stays excited, the higher the chance FRET may have occurred (note: this is not a rigorous statement because fluorescence emission and FRET quenching are independent stochastic processes and an excited fluorophore can

only relax through one route). Suppose that the timing of FRET follows an exponential distribution with a probability density function of

$$f(t) := \frac{1}{\tau'} e^{-\frac{t}{\tau'}}.$$

The probability that FRET does not happen before  $t_0$  will be

$$P(t > t_0) = \int_{t_0}^{+\infty} f(t) dt = e^{-\frac{t_0}{\tau'}}.$$

Excited fluorophores can either take the FRET quenching route or the fluorescence emission route to relax to the ground state (note: a fluorophore may also relax through other ways but the fact that these routes are independent stochastic processes means that it does not affect the following conclusion). Therefore, in the presence of acceptor fluorophores and FRET, the decay  $D$  of donor fluorescence becomes

$$D(t_0) = D_0(t_0) \cdot P(t > t_0) = C e^{-\frac{t_0}{\tau_0}} \cdot e^{-\frac{t_0}{\tau'}} := C e^{-\frac{t_0}{\tau}},$$

wherein the new lifetime is

$$\tau = \frac{\tau_0 \tau'}{\tau_0 + \tau'}$$

and the new total fluorescence signal is  $S = C\tau$ . Therefore,

$$\text{FRET efficiency} := \frac{S_0 - S}{S_0} = \frac{\tau_0 - \tau}{\tau_0}.$$

Because the fluorescence lifetime in the absence of quenching is an intrinsic property of a mature fluorescent protein (under a certain temperature) [13], the equation above greatly simplifies experiments to measure the FRET efficiency. This equation still applies even if the fluorescence decay has to be fitted by a multi-component exponential decay, as long as the fluorescence lifetime is an average weighted by the corresponding  $C$  of each component.

## Time-lapse live-cell imaging in knockdown-rescue mitotic duration assays

Time-lapse live-cell imaging was performed on an ImageXpress Nano Automated Imaging System (Molecular Devices). A SOLA Light Engine (Lumencor) served as the excitation light source. Cells were plated on 24-well cell imaging plates (black plate with treated glass bottom, Eppendorf) and treated with siRNAs and 100 nM nocodazole accordingly. Humidified 5% CO<sub>2</sub> was supplied to the environment chamber maintained at 37 °C.

According to [14], the level of MAD1 and MAD2 has to be balanced for a robust SAC. To make sure that the expression of exogenous, siMAD1-resistant MAD1(wild-type/mutant)-mNG in siMAD1-treated cells is close to the physiological level of endogenous MAD1 for all analyzed cells, we image the heterozygous MAD1-mNG genome-edited HeLa-A12 cell line [9] as the control in all of our knockdown-rescue mitotic duration assays. In this cell line, the stoichiometry of endogenous mNG-tagged versus untagged MAD1 is about 1 : 1 [9]. Therefore, only cells with mNG intensity (after background and shading correction) close to two times the mNG intensity in the heterozygous MAD1-mNG genome-edited HeLa-A12 cell line were analyzed in our knockdown-rescue mitotic duration assays (Figures 3A and 3C).

## Pull-down using amylose beads

BUB1:BUB3, CDC20, O-MAD2(V193N), and MBP-MAD1(wild-type or mutant):MAD2 were diluted using a binding buffer [20 mM HEPES (pH 7.5), 150 mM NaCl, 5% glycerol] in a total volume of 50  $\mu$ L. Unless specified otherwise, MBP-MAD1(wild-type or mutant):MAD2 and BUB1:BUB3 were diluted at 20  $\mu$ M and pre-phosphorylated at 4 °C for 16 h by MPS1 (1  $\mu$ M). The final concentration of MBP, MBP-MAD1(wild-type or mutant):MAD2 was 4  $\mu$ M; the final concentration of BUB1:BUB3, CDC20, and O-MAD2(V193N) were 5  $\mu$ M each. 50  $\mu$ L of the solution was mixed with 15  $\mu$ L of amylose beads (New England Biolabs). Samples were placed into Pierce™ micro-spin columns (ThermoFischer) and incubated at 4 °C for 1 h. To separate the proteins bound to the amylose beads from the unbound proteins, the samples were centrifuged at 900 g for 2 min at 4 °C. The beads were washed three times with 200  $\mu$ L of binding buffer. After the last washing step, 25  $\mu$ L of elution buffer (binding buffer plus 10 mM maltose) was added to the column and centrifuged at 800 g for 2 min at 4 °C. The eluted proteins were mixed with 5 $\times$  SDS-PAGE loading buffer and analyzed by SDS-PAGE and immunoblotting.

## Immunoprecipitation using mNeonGreen-Trap

HeLa-A12 cells integrated with the Tet-On expression cassette of either mNeonGreen, MAD1-mNG, or MAD1 $\Delta$ L-mNG were induced to express the ectopic exogenous protein by 0.1  $\mu$ g/mL doxycycline (for two days until being harvested) and arrested at mitosis using a thymidine–nocodazole synchronization protocol. Cells were harvested by mitotic shake-off, washed once by PBS, pelleted down by centrifugation at 200–500 g for 3 min, snap-frozen in liquid nitrogen, and stored at –80 °C before the immunoprecipitation (IP) experiment.

On the day of the immunoprecipitation experiment, cells were thawed on ice and lysed in the IP lysis buffer [75 mM HEPES-HCl (pH 7.5 at 4 °C), 150 mM KCl, 10% (by volume) glycerol, 1.5 mM MgCl<sub>2</sub>, 1.5 mM EGTA, and 1% (by mass) CHAPS, a zwitterionic detergent] supplemented before usage with 1 mM PMSF, the cOmplete™ EDTA-free Protease Inhibitor Cocktail, Phosphatase Inhibitor Cocktail IV (RPI), and a phosphatase inhibitor cocktail (1 mM Na<sub>4</sub>P<sub>2</sub>O<sub>7</sub>, 0.1 mM Na<sub>3</sub>VO<sub>4</sub>, 5 mM NaF, and 2 mM sodium  $\beta$ -glycerophosphate). For 1 mg of wet cell pellet, 40  $\mu$ L of 4 °C IP lysis buffer was added, yielding a total protein concentration of about 5.6 mg/mL (if cells were lysed completely). Resuspended cells were rotated for 30 min at 4 °C and then centrifuged at 18,000 g for 20 min at 4 °C. 600  $\mu$ L of supernatant was subsequently cleared by 50  $\mu$ L of equilibrated control agarose beads (ChromoTek) to reduce non-specific bindings, rotating for 45 min at 4 °C. The mixture was centrifuged at 2000 g for 5 min at 4 °C. 580  $\mu$ L of pre-cleared supernatant was then mixed with 30  $\mu$ L of equilibrated mNeonGreen-Trap Agarose (nta-20, ChromoTek) and rotated for 1 h at 4 °C. These beads were then pelleted down at 2000 g for 5 min at 4 °C and the supernatant was removed. The beads were further washed four times (rotated for 5 min at 4 °C and then pelleted down at 2000 g for 5 min at 4 °C) using 1 mL of the IP wash buffer [75 mM HEPES-HCl (pH 7.5 at 4 °C), 150 mM KCl, 10% (by volume) glycerol, 1.5 mM MgCl<sub>2</sub>, and 1.5 mM EGTA] each time. The beads were transferred to a fresh tube before the last wash to avoid the non-specific binding of proteins to the wall of the tube. Finally, 2 $\times$  Laemmli buffer supplemented with  $\beta$ -mercaptoethanol was added to the beads. Samples were boiled in a boiling water bath for 10 min before being subjected to SDS-PAGE and immunoblotting analysis.

## Immunoblotting

To acquire unsynchronized HeLa-A12 cells, asynchronous cells were either scrapped or trypsinized off the surface of dishes. To acquire mitotic HeLa-A12 cells, cells were first synchronized in G1/S with 2.5 mM thymidine and then arrested in mitosis with 330 nM of nocodazole for 16 h. This procedure is referred to as the thymidine–nocodazole synchronization protocol in the main text.



Harvested cells were then washed once by PBS, pelleted down, and chilled on ice. Lysis was performed by directly adding 2× Laemmli sample buffer (Bio-Rad Laboratories, supplemented by 2-mercaptoethanol) at a ratio of 1 µL per 0.1 mg of cell pellets and pipetting up and down. Lysates were boiled immediately afterward for 10 min and then chilled on ice. 8 µL of supernatant was loaded onto each lane of a 15-well, 0.75-mm SDS-PAGE mini gel.

Primary antibodies (and their working dilution factors by volume) used included anti-BUBR1 (Bethyl Laboratories A300-995A-M, 1 : 1000), anti-BUB1 (Abcam ab9000), anti-CDC20 (Santa Cruz Biotechnology sc-5296 for Figure 2F and sc-13162, 1 : 200 for others), anti-MAD2 (Bethyl Laboratories A300-301A-M, 1 : 330), anti-GAPDH (Proteintech 60004-1-Ig, 1 : 5000), anti-MAD1 (GeneTex GTX109519, 1 : 2000 in Figure 1E and PLA0092, 1 : 1000 in Figures S3B and S3D), anti-mNeonGreen (Cell Signaling Technology 53061S, 1 : 100), and anti-BUB3 (Sigma-Aldrich B7811, 1 : 500).

## References

1. Chen, C. *et al.* Ectopic activation of the spindle assembly checkpoint signaling cascade reveals its biochemical design. *Current Biology* **29**, 104–119 (2019).
2. Chen, C., Humphrey, L., Jema, S., Ferrari, F. & Joglekar, A. P. Bub1 availability limits the Spindle Assembly Checkpoint signaling strength of human kinetochores. *bioRxiv* (2022).
3. Ainaravapu, S. R. K. *et al.* Contour length and refolding rate of a small protein controlled by engineered disulfide bonds. *Biophysical Journal* **92**, 225–233 (2007).
4. Zhou, H.-X. Polymer models of protein stability, folding, and interactions. *Biochemistry* **43**, 2141–2154 (2004).
5. Lapidus, L. J., Steinbach, P. J., Eaton, W. A., Szabo, A. & Hofrichter, J. Effects of chain stiffness on the dynamics of loop formation in polypeptides. Appendix: testing a 1-dimensional diffusion model for peptide dynamics. *The Journal of Physical Chemistry B* **106**, 11628–11640 (2002).
6. Faesen, A. C. *et al.* Basis of catalytic assembly of the mitotic checkpoint complex. *Nature* **542**, 498–502 (2017).
7. Piano, V. *et al.* CDC20 assists its catalytic incorporation in the mitotic checkpoint complex. *Science* **371**, 67–71 (2021).
8. Roy, B., Verma, V., Sim, J., Fontan, A. & Joglekar, A. P. Delineating the contribution of Spc105-bound PP1 to spindle checkpoint silencing and kinetochore microtubule attachment regulation. *Journal of Cell Biology* **218**, 3926–3942 (2019).
9. Banerjee, A., Chen, C., Humphrey, L., Tyson, J. J. & Joglekar, A. P. BubR1 recruitment to the kinetochore via Bub1 enhances Spindle Assembly Checkpoint signaling. *Molecular Biology of the Cell*, In press.
10. Alfonso-Pérez, T., Hayward, D., Holder, J., Gruneberg, U. & Barr, F. A. MAD1-dependent recruitment of CDK1-CCNB1 to kinetochores promotes spindle checkpoint signaling. *Journal of Cell Biology* **218**, 1108–1117 (2019).
11. Li, J., Gao, J.-Z., Du, J.-L., Huang, Z.-X. & Wei, L.-X. Increased CDC20 expression is associated with development and progression of hepatocellular carcinoma. *International Journal of Oncology* **45**, 1547–1555 (2014).
12. Nilsson, J., Yekezare, M., Minshull, J. & Pines, J. The APC/C maintains the spindle assembly checkpoint by targeting Cdc20 for destruction. *Nature Cell Biology* **10**, 1411–1420 (2008).
13. Kafle, B. P. *Chemical Analysis and Material Characterization by Spectrophotometry* (Elsevier, 2020).



14. Heinrich, S. *et al.* Determinants of robustness in spindle assembly checkpoint signalling. *Nature Cell Biology* **15**, 1328–1339 (2013).
